1                    Genomics-enabled analysis of the emergent disease cotton bacterial blight

2    Anne Z. Phillips<sup>1,2</sup>, Jeffrey C. Berry<sup>1¶</sup>, Mark C. Wilson<sup>1¶</sup>, Anupama Vijayaraghavan<sup>1</sup>, Jillian Burke<sup>1</sup>,  
3    J. Imani Bunn<sup>1</sup>, Tom W. Allen<sup>3</sup>, Terry Wheeler<sup>4</sup>, Rebecca Bart<sup>1\*</sup>

4

5    <sup>1</sup>Donald Danforth Plant Science Center, St. Louis MO, United States of America

6    <sup>2</sup>Department of Biology, Washington University in Saint Louis, St. Louis, MO, United States of  
7    America

8    <sup>3</sup>Delta Research and Extension Center, Mississippi State University, Stoneville, MS, United  
9    States of America

10    <sup>4</sup>Texas AgriLife Research, Texas AgriLife Extension Service, Lubbock, TX, United States of  
11    America

12

13    \*Corresponding Author

14    Email: [rbart@danforthcenter.org](mailto:rbart@danforthcenter.org)

15

16    ¶these authors contributed equally to this work.

17

18

19

20

21

22

23

## 24 **Abstract**

25 Cotton bacterial blight (CBB), an important disease of (*Gossypium hirsutum*) in the early 20<sup>th</sup>  
26 century, had been controlled by resistant germplasm for over half a century. Recently, CBB re-  
27 emerged as an agronomic problem in the United States. Here, we report analysis of cotton  
28 variety planting statistics that indicate a steady increase in the percentage of susceptible cotton  
29 varieties grown each year since 2009. Phylogenetic analysis revealed that strains from the  
30 current outbreak cluster with race 18 *Xanthomonas citri* pv. *malvacearum* (*Xcm*) strains.  
31 Illumina based draft genomes were generated for thirteen *Xcm* isolates and analyzed along with  
32 4 previously published *Xcm* genomes. These genomes encode 24 conserved and nine variable  
33 type three effectors. Strains in the race 18 clade contain 3 to 5 more effectors than other *Xcm*  
34 strains. SMRT sequencing of two geographically and temporally diverse strains of *Xcm* yielded  
35 circular chromosomes and accompanying plasmids. These genomes encode eight and thirteen  
36 distinct transcription activator-like effector genes. RNA-sequencing revealed 52 genes induced  
37 within two cotton cultivars by both tested *Xcm* strains. This gene list includes a homeologous  
38 pair of genes, with homology to the known susceptibility gene, MLO. In contrast, the two  
39 strains of *Xcm* induce different clade III SWEET sugar transporters. Subsequent genome wide  
40 analysis revealed patterns in the overall expression of homeologous gene pairs in cotton after  
41 inoculation by *Xcm*. These data reveal host-pathogen specificity at the genetic level and  
42 strategies for future development of resistant cultivars.

43

## 44 **Author Summary**

45 Cotton bacterial blight (CBB), caused by *Xanthomonas citri* pv. *malvacearum* (*Xcm*), significantly  
46 limited cotton yields in the early 20<sup>th</sup> century but has been controlled by classical resistance  
47 genes for more than 50 years. In 2011, the pathogen re-emerged with a vengeance. In this  
48 study, we compare diverse pathogen isolates and cotton varieties to further understand the  
49 virulence mechanisms employed by *Xcm* and to identify promising resistance strategies. We  
50 generate fully contiguous genome assemblies for two diverse *Xcm* strains and identify pathogen  
51 proteins used to modulate host transcription and promote susceptibility. RNA-Sequencing of  
52 infected cotton reveals novel putative gene targets for the development of durable *Xcm*  
53 resistance. Together, the data presented reveal contributing factors for CBB re-emergence in  
54 the U.S. and highlight several promising routes towards the development of durable resistance  
55 including classical resistance genes and potential manipulation of susceptibility targets.

56

## 57 **Introduction**

58 Upland cotton (*Gossypium hirsutum* L.) is the world's leading natural fiber crop. Cotton  
59 is commercially grown in over 84 countries, and in the United States, is responsible for \$74  
60 billion annually [1, 2]. Numerous foliar diseases affect cotton throughout the world's cotton  
61 growing regions. Historically, one of the most significant foliar diseases has been bacterial  
62 blight, caused by *Xanthomonas citri* pv. *malvacearum*. Cotton bacterial blight significantly  
63 limited cotton yield in the late 20<sup>th</sup> century. In the 1940's and 1950's, breeders identified and  
64 introgressed multiple resistance loci into elite germplasm [3-5]. This strategy proved durable for  
65 over half a century. In 2011, cotton bacterial blight (CBB) returned and caused significant losses  
66 to farmers in the southern United States, including in Arkansas and Mississippi. Nonetheless,

67 CBB has received little research focus during the last several decades because, prior to 2011,  
68 losses from this disease were not substantial. Modern molecular and genomic technologies can  
69 now be employed expeditiously to deduce the underlying cause of the disease re-emergence  
70 and pinpoint optimized routes towards the development of durable resistance.

71 CBB is caused by *X. citri* pv. *malvacearum* (*Xcm*); however, the pathogen has previously  
72 been placed within other species groupings [6-9]. The *Xcm* pathovar can be further divided into  
73 at least 19 races according to virulence phenotypes on a panel of historical cotton cultivars:  
74 Acala-44, Stoneville 2B-S9, Stoneville 20, Mebane B-1, 1-10B, 20-3, and 101-102.B [10, 11].  
75 Historically, the most common race observed in the U.S. has been race 18, which was first  
76 isolated in 1973 [12]. This race is highly virulent, causing disease on all cultivars in the panel  
77 except for 101-102.B. However, this diagnostic panel of cotton varieties used to race type  
78 strains is no longer available from the USDA/ARS, Germplasm Resources Information Network  
79 (GRIN).

80 CBB can occur at any stage in the plant's life cycle and on any aerial organ. Typical  
81 symptoms include seedling blight as either pre- or post-emergent damping-off, black arm on  
82 petioles and stems, water-soaked spots on leaves and bracts, and most importantly boll rot  
83 [10]. The most commonly observed symptoms are the angular-shaped lesions on leaves that  
84 can coalesce and result in a systemic infection. Disease at each of these stages can cause yield  
85 losses either by injury to the plant or direct damage to the boll. No effective chemical  
86 treatments for the disease have been released to date. Methods to reduce yield loss as a result  
87 of CBB include acid de-linting cotton seed prior to planting, field cultivation practices to reduce

88 sources of overwintering inoculum and planting cultivars with known sources of resistance [3,  
89 4, 8, 13, 14].

90 Xanthomonads assemble the type three secretion system (T3SS), a needle-like structure,  
91 to inject diverse type three effectors (T3Es) into the plant cell to suppress immunity and  
92 promote disease [15-19]. For example, transcription activator-like (TAL) effectors influence the  
93 expression levels of host genes by binding directly to promoters in a sequence-specific way  
94 [20]. Up-regulated host genes that contribute to pathogen virulence are termed susceptibility  
95 genes and may be modified through genome editing for the development of resistant crop  
96 varieties [21].

97 Plants have specialized immune receptors, collectively known as nucleotide-binding  
98 leucine rich repeat receptors that recognize, either directly or indirectly, the pathogen effector  
99 molecules [22, 23]. Historically, this host-pathogen interaction has been termed the ‘gene-for-  
100 gene’ model of immunity, wherein a single gene from the host and a single gene from the  
101 pathogen are responsible for recognition [24]. Recognition triggers a strong immune response  
102 that often includes a localized hypersensitive response (HR) in which programmed cell death  
103 occurs around the infection site [25]. Nineteen CBB resistance loci have been reported in  
104 *Gossypium hirsutum* breeding programs; however, none have been molecularly identified [8,  
105 13].

106 Here we combine comparative genomics of the pathogen *Xcm* with transcriptomics of  
107 the host to identify molecular determinants of Cotton Bacterial Blight. This will inform the  
108 development of durable resistance strategies.

## 109 **Results**

## 110 **CBB Reemergence in the US**

111 In 2011, farmers, extension specialists, and certified crop advisers in Missouri,  
112 Mississippi, and Arkansas observed cotton plants exhibiting symptoms of CBB. Widespread  
113 infected plant material was observed throughout much of the production area, but appeared to  
114 be centered around Clarksdale, Mississippi. In figure 1, we collate reports from this outbreak  
115 and overlay these data with US cotton planting statistics to reveal that this disease has spread  
116 through much of the cotton belt in the southern U.S. (Figs 1 and S1, Table S1). To date, CBB has  
117 been reported from at least eight out of the sixteen states that grow cotton (Fig 1). In 2014, we  
118 collected diseased cotton leaves from two sites across Mississippi and proved pathogen  
119 causality following Koch's postulates [26]. In addition, PCR amplification of the 16S rRNA gene  
120 confirmed that the causal agent was a member of the *Xanthomonas* genus. Multi locus  
121 sequence type (MLST) analysis and maximum-likelihood analysis were performed using  
122 concatenated sections of the *gltA*, *lepA*, *lacF*, *gyrB*, *fusA* and *gap-1* loci for increased  
123 phylogenetic resolution (Fig 2a). The newly sequenced strains were named MS14002 and  
124 MS14003 and were compared to four previously published *Xcm* genomes and thirty-six  
125 additional *Xanthomonas* genomes representing thirteen species (Tables 1, S2). MS14002 and  
126 MS14003 grouped with the previously published *Xcm* strains as a single unresolved clade,  
127 further confirming that the current disease outbreak is CBB and is caused by *Xcm*. The species  
128 designation reported here is consistent with previous reports [6, 7].

129

130

131

132

133

134 **Table 1:** Illumina and SMRT sequenced *Xcm* genomes described in this paper.

| Strain Name | Identifier | Lat.  | Long.  | City/Country   | Year | Provider  | Collector       | Platform | Contig # | Avg Contig Len | Total Bases | n50     |
|-------------|------------|-------|--------|----------------|------|-----------|-----------------|----------|----------|----------------|-------------|---------|
| MS14002     |            | 34.12 | -90.52 | Clarksdale, MS | 2014 | R.Bart    | R.Bart          | Illumina | 545      | 9443.27        | 5146580     | 62542   |
| MS14003     |            | 32.95 | -90.51 | Wilzone, MS    | 2014 | R.Bart    | R.Bart          | Illumina | 2577     | 1511.35        | 3894744     | 2209    |
| Race1       |            |       |        | US             |      | S.lu      | P.Thaxton       | Illumina | 523      | 10127.35       | 5296606     | 48599   |
| Race2       |            |       |        | US             |      | S.lu      | P.Thaxton       | Illumina | 387      | 13402.57       | 5186796     | 54804   |
| Race3       |            |       |        | US             |      | S.lu      | P.Thaxton       | Illumina | 725      | 7207.34        | 5225324     | 28344   |
| Race12      |            |       |        | US             |      | S.lu      | P.Thaxton       | Illumina | 632      | 8134.35        | 5140911     | 21428   |
| Race18      |            |       |        | US             |      | S.lu      | P.Thaxton       | Illumina | 369      | 13924.03       | 5137968     | 112543  |
| AR81009     | CFBP2035   |       |        | Argentina      | 1981 | CIRM-CFBP | Frossard P      | Illumina | 306      | 17182.59       | 5257872     | 86594   |
| MA81010     | CFBP2036   |       |        | Mali           | 1981 | CIRM-CFBP | Frossard P      | Illumina | 584      | 9033.09        | 5275326     | 23323   |
| SU58011     | CFBP2530   |       |        | Sudan          | 1958 | CIRM-CFBP | Last F.T. M2519 | Illumina | 1134     | 4563.33        | 5174819     | 9682    |
| SU9012      | CFBP5637   |       |        | Sudan          | 1992 | CIRM-CFBP | Schmit J. 11781 | Illumina | 377      | 13919.54       | 5247665     | 88522   |
| Xcm013      | MSCT4      |       |        | US             |      | S.lu      |                 | Illumina | 2169     | 2151.5         | 4666607     | 3869    |
| Xcm014      | MSCT8      |       |        | US             |      | S.lu      |                 | Illumina | 580      | 8929.58        | 5179156     | 88255   |
| MS14003     |            | 32.95 | -90.51 | Wilzone, MS    | 2014 | R.Bart    | R.Bart          | SMRT     | 4        | 1286176.5      | 5144706     | 5029617 |
| AR81009     | CFBP2035   |       |        | Argentina      | 1981 | CIRM-CFBP | Frossard P      | SMRT     | 4        | 1352212        | 5408848     | 5267057 |

135

136 **Contemporary U.S. *Xcm* strains cluster phylogenetically with historical race 18 strains.**

137 Race groups have been described for *Xcm* strains by analyzing compatible (susceptible)  
138 and incompatible (resistant) interactions on a panel of seven cotton cultivars. Different  
139 geographies often harbor different pathogen races [7]. Consequently, one possible explanation  
140 for the recent outbreak of CBB would be the introduction of a new race of *Xcm* capable of  
141 overcoming existing genetic resistance. Only 2 varieties of the original cotton panel plus three  
142 related cultivars, were available and these cultivars were not sufficient to determine whether a  
143 new race had established within the U.S. Thirteen *Xcm* strains were sequenced using Illumina  
144 technology to determine the phylogenetic relationship between recent isolates of *Xcm* and  
145 historical isolates. Isolates designated as race 1, race 2, race 3, race 12 and race 18 have been  
146 maintained at Mississippi State University with these designations. Additional isolates were  
147 obtained from the Collection Française de Bactéries associées aux Plantes (CFBP) culture  
148 collection. Together, these isolates include nine strains from the US, three from Africa, and one  
149 from South America and span collection dates ranging from 1958 through 2014 (Fig 1, Table 1).  
150 Illumina reads were mapped to the *Xanthomonas citri* subsp. *citri* strain Aw12879 (Genbank  
151 assembly accession: GCA\_000349225.1) using Bowtie2 and single nucleotide polymorphisms  
152 (SNPs) were identified using Samtools [27, 28]. Only regions of the genome with at least 10x  
153 coverage for all genomes were considered. This approach identified 17,853 sites that were  
154 polymorphic in at least one genome. Nucleotides were concatenated and used to build a  
155 neighbor-joining tree (Fig 2b). This analysis revealed that recent U.S. *Xcm* isolates grouped with  
156 the race 18 clade. Notably, the race 18 clade is phylogenetically distant from the other *Xcm*  
157 isolates.



158 **Contemporary US *Xcm* strains have conserved type three virulence protein arsenals and**  
159 **disease phenotypes with historical race 18 strains.**

160 Xanthomonads deploy many classes of virulence factors to promote disease. Type three  
161 effectors (T3E) are of particular interest for their role in determining race designations. T3E  
162 profiles from sixteen *Xcm* isolates were compared to determine whether a change in the  
163 virulence protein arsenal of the newly isolated strains could explain the re-emergence of CBB.  
164 Genomes from 13 *Xcm* isolates were *de novo* assembled with SPAdes and annotated with  
165 Prokka based on annotations from the *X. euvesicatoria* (aka. *X. campestris* pv. *vesicatoria*) 85-10  
166 genome (NCBI accession: NC\_007508.1). T3Es pose a particular challenge for reference based  
167 annotation as no bacterial genome contains all effectors. Consequently, an additional protein  
168 file containing known T3Es from our previous work was included within the Prokka annotation  
169 pipeline [15, 29]. This analysis revealed 24 conserved and 9 variable *Xcm* T3Es (Fig 3a). Race 18  
170 clade isolates contain more effectors than other isolates that were sequenced. The recent *Xcm*  
171 isolates (MS14002 and MS14003) were not distinguishable from the historical race 18 isolate,  
172 with the exception of XcmNI86 isolated from Nicaragua in 1986, which contains mutations in  
173 XopE2 and XopP.

174 Analysis of the genomic sequence of T3Es revealed presence/absence differences,  
175 frameshifts and premature stop codons. However, this analysis does not preclude potential  
176 allelic or expression differences among the virulence proteins that could be contributing factors  
177 to the re-emergence of CBB. Therefore, newly isolated strains may harbor subtle genomic  
178 changes that have allowed them to overcome existing resistance phenotypes. Many  
179 commercial cultivars of cotton are reported to be resistant to CBB [30-32]. Based on these

180 previous reports, we selected commercial cultivars resistant and susceptible (6 of each) to CBB.  
181 In addition, we included 5 available varieties that are related to the historical panel as well as 2  
182 parents from a nested association mapping (NAM) population currently under development  
183 [33]. All varieties inoculated with the newly isolated *Xcm* strains exhibited inoculation  
184 phenotypes consistent with previous reports (Figs 3b,c). In these assays, bright field and near  
185 infrared (NIR) imaging were used to distinguish water-soaked disease symptoms from rapid cell  
186 death (HR) that is indicative of an immune response. These data confirm that existing resistance  
187 genes present within cotton germplasm are able to recognize the newly isolated *Xcm* strains  
188 and trigger a hypersensitive response. Together, the phylogenetic analysis, effector profile  
189 conservation and cotton inoculation phenotypes, confirm that the recent outbreak of *Xcm* in  
190 the US represents a re-emergence of a race 18 clade *Xcm* and is not the result of a dramatic  
191 shift in the pathogen.

192 The USDA Agricultural Marketing Service (AMS) releases reports on the percentage of  
193 upland cotton cultivars planted in the U.S. each year ([www.ams.usda.gov/mnreports/cnavar.pdf](http://www.ams.usda.gov/mnreports/cnavar.pdf)).  
194 Most of these varieties are screened for resistance or susceptibility to multiple strains of *Xcm*  
195 by extension scientists and published in news bulletins [30, 31, 34-38]. These distinct datasets  
196 were cross referenced to reveal that only 25% of the total cotton acreage was planted with  
197 resistant cultivars in 2016 (Fig 3d, Table S3). This is part of a larger downward trend in which  
198 the acreage of resistant cultivars has fallen each year since at least 2009 when the percentage  
199 of acreage planted with resistant varieties was at 75%.

## 200 **Comparative genome analysis for two *Xcm* strains**

201 Differences in virulence were observed among *Xcm* strains at the molecular and  
202 phenotypic level. In order to gain insight into these differences, we selected two strains from  
203 our collection that differed in T3E content, virulence level, geography of origin and isolation  
204 date. AR81009 was isolated in Argentina in 1981 and is one of the most virulent strains  
205 investigated in this study; MS14003 was isolated in Mississippi in 2014 and is a representative  
206 strain of the race 18 clade (Fig S2). The latter strain causes comparatively slower and  
207 diminished leaf symptoms; however, both strains are able to multiply and cause disease on  
208 susceptible varieties of cotton (Fig S3). Full genome sequences were generated with Single  
209 Molecule Real-Time (SMRT) sequencing. Genomes were assembled using the PacBio Falcon  
210 assembler which yielded circular 5Mb genomes and associated plasmids. Genic synteny  
211 between the two strains was observed with the exception of two 1.05 Mb inversions (Fig 4).  
212 Regions of high and low GC content, indicative of horizontal gene transfer, were identified in  
213 both genomes. In particular, a 120kb insertion with low GC content was observed in AR81009.  
214 This region contains one T3E as well as two annotated type four secretion system-related  
215 genes, two conjugal transfer proteins, and two multi drug resistant genes (Fig 4 insert).  
216 MS14003 contains three plasmids (52.4, 47.4, and 15.3kb) while AR81009 contains two  
217 plasmids (92.6 and 22.9kb). Analysis of homologous regions among the plasmids was  
218 performed using progressiveMauve [39]. This identified four homologous regions greater than  
219 1kb that were shared among multiple plasmids (Fig 4).

220 Both strains express TAL effector proteins as demonstrated through western blot  
221 analysis using a TAL effector specific polyclonal antibody (Fig 5) [40]. However, the complexity  
222 of TAL effector repertoires within these strains prevented complete resolution of each

223 individual TAL effector. The long reads obtained from SMRT sequencing are able to span whole  
224 TAL effectors, allowing for full assemblies of the TAL effectors in each strain. The AR81009  
225 genome encodes twelve TAL effectors that range in size from twelve to twenty three repeat  
226 lengths, six of which reside on plasmids. The MS14003 genome encodes eight TAL effectors that  
227 range in size from fourteen to twenty eight repeat lengths, seven of which reside on plasmids  
228 (Fig 5). Three partial TAL effector-like coding sequences were also identified within these  
229 genomes and are presumed to be non-functional. A 1-repeat gene with reduced 5' and 3'  
230 regions was identified in both strains directly upstream of a complete TAL effector. In addition,  
231 a large 4kb TAL effector was identified in AR81009 with a 1.5 kb insertion and 10 complete  
232 repeat sequences. The tool AnnoTALE was used to annotate and group TAL effectors based on  
233 the identities of the repeat variable diresidues (RVDs) in each gene [41]. Little homology was  
234 identified among TAL RVD sequences within and between strains; only two TAL effectors were  
235 determined to be within the same TAL class between strains (TAL19b of AR81009 and TAL19 of  
236 MS14003) and two within strain MS14003 (TAL14b and TAL16).

### 237 **Transcriptome changes induced by *Xcm* in *G. hirsutum*.**

238 An RNA-sequencing experiment was designed to determine whether AR81009 and  
239 MS14003 incite different host responses during infection (Fig 6a, b). Isolates were inoculated  
240 into the phylogenetically diverse *G. hirsutum* cultivars Acala Maxxa and DES 56 [33]. Infected  
241 and mock-treated tissue were collected at 24 and 48 hours post inoculation. First, we  
242 considered global transcriptome patterns of gene expression. Fifty-two genes were determined  
243 to be induced in all *Xcm-G. hirsutum* interactions at 48 hours (Fig 6c, Table S4). Of note among  
244 this list is a homeologous pair of genes with homology to the known susceptibility target MLO

245 [42-45]. Gene induction by a single strain was also observed; AR81009 and MS14003 uniquely  
246 induced 127 and 16 *G. hirsutum* genes, respectively (Fig 6c). In contrast, the average magnitude  
247 of gene induction between the two strains was not significantly different (Fig S4). Both *Xcm*  
248 strains caused more genes to be differentially expressed in DES 56 than in Acala Maxxa. Among  
249 the 52 genes significantly induced by both strains, sixteen conserved targets are homeologous  
250 pairs, whereas seventeen and fifteen genes are encoded by the A and D sub-genomes,  
251 respectively (Tables 2 and S4). It has been previously reported that homeologous genes  
252 encoded on the *G. hirsutum* A and D sub-genomes are differentially regulated during abiotic  
253 stress [46]. A set of approximately 10,000 homeologous gene pairs were selected and  
254 differential gene expression was assessed (Fig 7). For each pairwise comparison of *Xcm* strain  
255 and *G. hirsutum* cultivar, a similar number of genes were differentially expressed in each of the  
256 A and D subgenomes. However, some homeologous pairs were up- or down-regulated  
257 differentially in response to disease, indicating a level of sub-genome specific responses to  
258 disease. For example, SWEET sugar transporter gene Gh\_D12G1898 in the D genome is induced  
259 over fourfold during infection with *Xcm* strain AR81009, while the homeolog Gh\_A12G1747 in  
260 the A genome is induced to a much smaller extent.

261 **Table 2:** Eight homeologous pairs of *Gossypium hirsutum* genes are upregulated in both Acala Maxxa and DES 56  
262 varieties 48 hours post inoculation with *Xanthomonas citri* pv. *malvacearum* strains MS14003 and AR81009.

| A Genome    | D Genome    | Gene Annotation                        |
|-------------|-------------|----------------------------------------|
| Gh_A02G0615 | Gh_D02G0670 | Seven transmembrane MLO family protein |
| Gh_A03G0560 | Gh_D03G0971 | Pectate lyase family protein           |
| Gh_A05G2012 | Gh_D05G2256 | Protein of unknown function DUF688     |
| Gh_A06G0439 | Gh_D06G0479 | basic chitinase                        |
| Gh_A07G1129 | Gh_D07G1229 | Protein of unknown function (DUF1278)  |
| Gh_A10G0257 | Gh_D10G0257 | Protein E6                             |
| Gh_A10G1075 | Gh_D10G1437 | Pectin lyase-like superfamily protein  |

---

Gh\_A13G1467 Gh\_D13G1816 pathogenesis-related 4

---

263

264 **Different strains of *Xcm* target distinct SWEET transporters in *G. hirsutum*.**

265 SWEET sugar transporter genes have been reported to be targets of and upregulated by  
266 *Xanthomonas* TAL effectors in *Manihot esculenta*, *Oryza sativa*, and *Citrus sinensis* [21, 40, 47,  
267 48]. In rice and cassava, the SWEET genes are confirmed susceptibility genes that contribute to  
268 disease symptoms. The previously reported susceptibility genes and the SWEETs identified  
269 here, are clade III sugar transporters (Fig S5). The NBI *Gossypium hirsutum* genome encodes 54  
270 putative SWEET sugar transporter genes. Of these 54 genes, three were upregulated greater  
271 than fourfold in response to inoculation by one of the two *Xcm* strains (Fig 8). Predicted TAL  
272 effector binding sites were identified using the program TALEnt [49]. MS14003 significantly  
273 induces the homeologs Gh\_A04G0861 and Gh\_D04G1360 and contains the TAL effectors M14b,  
274 M28a, and M28b, which are predicted to bind within the 300bp promoter sequences of at least  
275 one of these genes. Of note is TAL M28a, which is predicted to bind both homeologs (Fig S6a).  
276 In contrast, AR81009 induces Gh\_D12G1898 to a greater extent than its homeolog  
277 Gh\_A12G1747. TAL effectors A14c and A16b from AR81009 are predicted to bind to the  
278 Gh\_D12G1898 and Gh\_A12G1747 promoters; however, TAL A14a is predicted to bind only the  
279 Gh\_D12G1898 promoter (Fig S6b). We note that while Gh\_A12G1747 did not pass the fourfold  
280 cut off for gene induction, this gene is slightly induced compared to mock inoculation.

281 **Discussion**

282 Cotton Bacterial Blight was considered controlled in the U.S. until an outbreak was  
283 observed during the 2011 growing season in Missouri, Mississippi and Arkansas [50]. Until 2011,

284 seed sterilization, breeding for resistant varieties, and farming techniques such as crop rotation  
285 and sterilizing equipment prevented the disease from becoming an economic concern [51]. The  
286 number of counties reporting incidence of CBB has increased from 17 counties in 2011 to 77  
287 counties in 2015 [38, 52, 53]. This paper investigates the root of the re-emergence and  
288 identifies several routes towards control of the disease.

289           When CBB was first recognized as re-emerging, several possible explanations were  
290 proposed including: (1) A highly virulent race of the pathogen that had been introduced to the  
291 U.S.; (2) Historical strains of *Xcm* that had evolved to overcome existing resistance (e.g. an  
292 effector gene change or host shift); and (3) Environmental conditions over the last several years  
293 that had been particularly conducive to the disease. Here, we present evidence that the re-  
294 emergence of CBB is not due to a large genetic change or race shift in the pathogen. Rather, the  
295 re-emergence of the disease is likely due to agricultural factors such as large areas of  
296 susceptible cultivars being planted. The presented data do not rule out potential environmental  
297 conditions that may also have contributed to the re-emergence. In this context, environmental  
298 conditions include disease conducive temperature and humidity as well as potentially  
299 contaminated seed or other agronomic practices that may have perpetuated spread of the  
300 disease outbreaks. Importantly, the presented data confirm that the presence of resistance loci  
301 could be deployed to prevent further spread of this disease. However, since many of the most  
302 popular farmer preferred varieties lack these resistance traits, additional breeding or  
303 biotechnology strategies will be needed to maximize utility. Notably, the current *Xcm* isolates  
304 characterized in this study all originate from Mississippi cotton fields in 2014. During the 2015  
305 and 2016 growing seasons, resistant cotton cultivars were observed in Texas with symptoms

306 indicative of bacterial infection distinct from CBB. Additional work is underway to identify and  
307 characterize the causal agent(s) of these disease symptoms.

308         Recent work on CBB in the US has focused on the most prevalent US *Xcm* race: race 18.  
309 However, races are not necessarily phylogenetically distinct clades. Race 18 isolates have been  
310 reported overseas, indicating that there may be independent origins of the race or cross-  
311 continent movement of this pathogen. Phenotypic race delineations were created before  
312 modern genetic and phylogenetic techniques were developed. However, modern genetics  
313 presents the opportunity to begin classifying strains based upon phylogenetic and effector  
314 profiles rather than phenotypes on a limited range of host varieties. Here, we identify all known  
315 and putative race 18 isolates as phylogenetically grouped into a single clade and distinct from  
316 other *Xcm* isolates. Future efforts can further explore phylogenetic relatedness among diverse  
317 isolates.

318         While resistant cotton cultivars were identified for all strains in this study, variability in  
319 symptom severity was observed for different strains when inoculated into susceptible cultivars.  
320 Two strains in particular, MS14003 and AR81009, have different effector profiles as well as  
321 different disease phenotypes. Comparative genomic analysis of the two pathogens revealed  
322 many differences that may contribute to the relative disease severity phenotypes. Similarly,  
323 transcriptomic analysis of two cultivars of *G. hirsutum* inoculated with these strains confirm  
324 that the genomic differences between the two strains result in a divergence in their molecular  
325 targets in the host.

326         Over the past decade, susceptibility genes have become targets for developing disease  
327 tolerant plants [54, 55]. These genes are typically highly induced during infection [56].



328 Therefore, RNA-Seq of infected plants has become a preferred way to identify candidate  
329 susceptibility genes. Once identified, genome editing can be used to block induction of these  
330 genes [57]. We report a homeologous pair of genes that are homologs of the MLO gene as  
331 targeted by both *Xcm* strains in both cotton cultivars. These genes are excellent candidates for  
332 future biotechnology efforts. Because the potential importance of these genes in cotton biology  
333 is unknown, their role in cotton physiology must first be explored. Knock-out mutations of MLO  
334 genes in other systems has led to durable resistance against powdery mildew as well as  
335 oomycetes and bacteria such as *Xanthomonas* [42, 45]. The dual purpose of host susceptibility  
336 genes has been observed previously. For example, the rice *Xa13* (aka. *Os8N3* and *OsSWEET11*)  
337 gene is required for pollen development but also targeted by a rice pathogen during infection  
338 [58]. *Xa13* is a member of the clade III SWEET sugar transporters implicated in many  
339 pathosystems. In this case, the induction of *Xa13* for pathogen susceptibility is mediated by a  
340 TAL effector. Of the 54 SWEET genes in the *G. hirsutum* genome, at least three are significantly  
341 upregulated during *Xcm* infection. In contrast to MLO, no single SWEET gene was induced by  
342 both pathogen strains in both hosts.

343 Analysis of SWEET gene expression after inoculation revealed a context for polyploidy in  
344 the *G. hirsutum-Xcm* pathosystem. This relatively unexplored area of plant-microbe interactions  
345 arose from our observation of a potential difference in induction magnitude between the  
346 homeologous Gh\_A12G1747 and Gh\_D12G1898 SWEET genes. Further analysis revealed many  
347 examples of preferentially induced or down-regulated homeologs in response to *Xcm* infection.  
348 Characterization of sub-genome specialization may lead to new insights regarding durability of  
349 resistance and susceptibility loci in polyploid crops. Future research may investigate the diploid

350 ancestors of tetraploid cotton to further explore the evolution of host and pathogen in the  
351 context of ploidy events [59]

352 Multiple putative TAL effector binding sites were identified within each up-regulated  
353 SWEET promoter. These observations suggest that TAL M28a from MS14003 may induce the  
354 homeologs Gh\_A04G0861 and Gh\_D04G1360. Further, TAL effector A14a from AR81009 is  
355 likely responsible for the upregulation of Gh\_D12G1898. Whether additional TAL effectors are  
356 involved in these responses is not clear. Genome organization in the host, such as histone  
357 modifications or other epigenetic regulations may also be affecting these interactions. Future  
358 research will investigate these mechanisms further.

359 Collectively, the data presented here suggest that the wide-spread planting of CBB-  
360 susceptible cultivars has contributed to the re-emergence of CBB in the southern U.S. It is  
361 possible that a reservoir of race 18 *Xcm* was maintained in cotton fields below the level of  
362 detection due to resistant cultivars planted in the 1990s and early 2000s. Alternatively, the  
363 pathogen may have persisted on an alternate host or was re-introduced by contaminated seed  
364 [9, 10]. Regardless of the cause of the re-emergence, the genomic comparisons among  
365 pathogen races and host cultivars has identified several possible routes towards resistance.  
366 These include the use of existing effective resistance loci as well as the potential disruption of  
367 the induction of susceptibility genes through genome editing. The latter is an attractive strategy  
368 in part because of recent progress in genome editing [60, 61]. In summary, within a relatively  
369 short time frame, through the deployment of modern molecular and genomic techniques, we  
370 were able to identify factors that likely contribute to the re-emergence of cotton bacterial

371 blight and generate data that can now be rapidly translated to effective disease control  
372 strategies.

## 373 **Materials & Methods**

### 374 ***Xcm* strain isolation and manipulation:**

375           New *Xcm* strains were isolated from infected cotton leaves by grinding tissue in 10mM  
376 MgCl<sub>2</sub> and culturing bacteria on NYGA media. The most abundant colony type was selected,  
377 single colony purified and then 16S sequencing was used to confirm the bacterial genus as  
378 previously described [62]. In addition, single colony purified strains were re-inoculated into  
379 cotton leaves and the appearance of water soaked symptoms indicative of CBB infection was  
380 confirmed. Both newly isolated strains as well as strains received from collaborators were used  
381 to generate a rifampicin resistance version of each strain. Wildtype strains were grown on  
382 NYGA, then transferred to NYGA containing 100µg/ml rifampicin. After approximately 4-5 days,  
383 single colonies emerged. These were single colony purified and stored at -80C. The rifampicin  
384 resistant version of each *Xcm* strain was used in all subsequent experiments reported in this  
385 manuscript unless otherwise noted.

### 386 **Plant inoculations**

387           Cotton varieties from the original cotton panel for determining *Xcm* race designations  
388 were obtained from the USDA/ARS, Germplasm Resources Information Network (GRIN).  
389 Varieties included in the *G. hirsutum* NAM population were provided by Vasu Kuraparthi [33].  
390 Other commercial varieties were obtained from Terry Wheeler and Tom Allen. Disease assays  
391 were conducted in a growth chamber set at 30°C and 80% humidity. *Xcm* strains were grown on  
392 NYGA plates containing 100µg/ml rifampicin at 30°C for two days before inoculations were

393 performed. Inoculations were conducted by infiltrating a fully expanded leaf with a bacterial  
394 solution in 10mM MgCl<sub>2</sub> (OD<sub>600</sub> specified within each assay).

395 The field tests were conducted as follows: Cotton cultivars are planted in two row plots  
396 (10 – 11 m in length, 1 m row spacing), in a randomized complete block design with four  
397 replications. Approximately 60 to 80 days after planting, *Xcm* was applied to the test area  
398 similar to that described in Wheeler et al. (2007) [37]. Briefly, *Xcm* is grown in trypticase soy  
399 broth (30 g/L) for 1 ½ days and then 19 L of the concentrated bacterial solution (10<sup>8</sup> cfu/ml) are  
400 diluted into 189 L of water (resulting in 10<sup>6</sup> cfu/ml) . The surfactant Silwet L-77  
401 (polyalkyleneoxide modified heptamethyltrisiloxane, Loveland Industries, Greeley, CO) is added  
402 at 0.2% v/v. The suspension of bacteria are sprayed over the top of the cotton at a pressure of  
403 83 kpa and rate of 470 L/ha. The nozzles used were TeeJet 8008. Symptoms were typically  
404 visible 14 days after application and plots were rated for incidence of symptoms 17-21 days  
405 after application [34-37].

#### 406 **Cotton Cultivar Statistics**

407 Area of cotton planted per county in the United States in 2015 was obtained from the  
408 USDA National Agricultural Statistics Service:  
409 [www.nass.usda.gov/Statistics\\_by\\_Subject/result.php?7061F36A-A4C6-3C65-BD7F-](http://www.nass.usda.gov/Statistics_by_Subject/result.php?7061F36A-A4C6-3C65-BD7F-129B702CFBA2&sector=CROPS&group=FIELD%20CROPS&comm=COTTONUSDA)  
410 [129B702CFBA2&sector=CROPS&group=FIELD%20CROPS&comm=COTTONUSDA](http://www.nass.usda.gov/Statistics_by_Subject/result.php?7061F36A-A4C6-3C65-BD7F-129B702CFBA2&sector=CROPS&group=FIELD%20CROPS&comm=COTTONUSDA). Estimated  
411 percentage of upland cotton planted for each variety was obtained from the Agricultural  
412 Marketing Service (AMS): [www.ams.usda.gov/mnreports/canvar.pdf](http://www.ams.usda.gov/mnreports/canvar.pdf).

#### 413 **Bacterial Sequencing and Phylogenetics**

414 Illumina based genomic datasets were generated as previously described [29]. Paired-  
415 end Illumina reads were trimmed using Trimmomatic v0.32 (ILLUMINACLIP:TruSeq3-  
416 PE.fa:2:30:10 LEADING:3 TRAILING:3 SLIDINGWINDOW:4:15 MINLEN:36) [63]. Genome  
417 assemblies were generated using the SPAdes *de novo* genome assembler [64]. Strain  
418 information is reported in Supplemental Table 1. Similar to our previously published methods  
419 [29], the program Prokka was used in conjunction with a T3E database to identify type three  
420 effector repertoires for each of the 12 *Xcm* isolates as well as four *Xcm* genomes previously  
421 deposited on NCBI (S2Table) [65].

422 Multi-locus sequence analysis was conducted by concatenating sequences of the *gltA*,  
423 *lepA*, *lacF*, *gyrB*, *fusA* and *gap-1* loci obtained from the Plant-Associated Microbes Database  
424 (PAMDB) for each strain as previously described [66]. A maximum-likelihood tree using these  
425 concatenated sequences was generated using CLC Genomics 7.5.

#### 426 **Variant Based Phylogeny**

427 A variant based dendrogram was created by comparing 12 Illumina sequenced *Xcm*  
428 genomes to the complete *Xanthomonas citri* subsp. *citri* strain Aw12879 reference genome  
429 (Genbank assembly accession: GCA\_000349225.1) on NCBI. Read pairs were aligned to the  
430 reference genome using Bowtie2 v2.2.9 with default alignment parameters [27]. From these  
431 alignments, single nucleotide polymorphisms (SNPs) were identified using samtools mpileup  
432 v1.3 and the bcftools call v1.3.1 multi-allelic caller [28]. Using Python v2.7, the output from  
433 samtools mpileup was used to identify loci in the *X. citri* subsp. *citri* reference genome with a  
434 minimum coverage of 10 reads in each *Xcm* genome used Python version 2.7 available at  
435 <http://www.python.org>. Vcftools v0.1.14 and bedtools v2.25.0 were used in combination to

436 remove sites marked as insertions or deletions, low quality, or heterozygous in any of the  
437 genomes [67, 68]. Remaining loci were concatenated to create a FASTA alignment of confident  
438 loci. Reference loci were used where SNP's were not detected in a genome. The resulting FASTA  
439 alignment contained 17853 loci per strain. This alignment was loaded into the online Simple  
440 Phylogeny Tool from the ClustalW2 package to create a neighbor joining tree of the assessed  
441 strains [69, 70]. Trees were visualized using FigTree v1.4.2.

#### 442 **Genome Assembly**

443 Single Molecule, Real Time (SMRT) sequencing of *Xcm* strains MS14003 and AR81009  
444 was obtained from DNA prepped using a standard CTAB DNA preparation. Blue Pippin size  
445 selection and library preparation was done at the University of Delaware Sequencing Facility.  
446 The genomes were assembled using FALCON-Integrate  
447 (<https://github.com/PacificBiosciences/FALCON-integrate/commit/cd9e93>) [71]. The following  
448 parameters were used: Assembly parameters for MS14003: length\_cutoff = 7000;  
449 length\_cutoff\_pr = 7000; pa\_HPCdaligner\_option = -v -dal8 -t16 -e.70 -l2000 -s240 -M10;  
450 ovlp\_HPCdaligner\_option = -v -dal8 -t32 -h60 -e.96 -l2000 -s240 -M10; falcon\_sense\_option = --  
451 output\_multi --min\_idt 0.70 --min\_cov 5 --local\_match\_count\_threshold 2 --max\_n\_read 300 --  
452 n\_core 6; overlap\_filtering\_setting = --max\_diff 80 --max\_cov 160 --min\_cov 5 --bestn 10;  
453 Assembly parameters for AR81009: length\_cutoff = 8000; length\_cutoff\_pr = 8000;  
454 pa\_HPCdaligner\_option = -v -dal8 -t16 -e.72 -l2000 -s240 -M10; ovlp\_HPCdaligner\_option = -v -  
455 dal8 -t32 -h60 -e.96 -l2000 -s240 -M10; falcon\_sense\_option = --output\_multi --min\_idt 0.72 --  
456 min\_cov 4 --local\_match\_count\_threshold 2 --max\_n\_read 320 --n\_core 6;  
457 overlap\_filtering\_setting = --max\_diff 90 --max\_cov 300 --min\_cov 10 --bestn 10. Assemblies

458 were polished using iterations of pbalign and quiver, which can be found at  
459 <https://github.com/PacificBiosciences/pbalign/commit/cda7abb> and  
460 <https://github.com/PacificBiosciences/GenomicConsensus/commit/43775fa>. Two iterations  
461 were run for *Xcm* strain MS14003 and 3 iterations for AR81009. Chromosomes were then  
462 reoriented to the DnaA gene and plasmids were reoriented to ParA. The assemblies were  
463 checked for overlap using BLAST, and trimmed to circularize the sequences [72]. TAL effectors  
464 were annotated and grouped by RVD sequences using AnnoTALE [41]. Homologous regions  
465 among plasmids that are greater than 1 kb were determined using progressiveMauve [39].  
466 Genomic comparisons between the MS14003 and AR81009 chromosomes were visualized using  
467 Circos [73]. Single-copy genes on each of the chromosomes were identified and joined using  
468 their annotated gene IDs. Lines connecting the two chromosomes represent these common  
469 genes and their respective positions in each genome. A sliding window of 1KB was used to  
470 determine the average GC content. Methylation was determined using the Base Modification  
471 and Motif Analysis workflow from pbsmrtpipe v0.42.0 at  
472 <https://github.com/PacificBiosciences/pbsmrtpipe>.

### 473 **Western Blot Analysis**

474 Western Blot analysis of Transcription Activator-Like (TAL) effectors was performed  
475 using a polyclonal TAL specific antibody [40]. Briefly, bacteria were suspended in 5.4 pH  
476 minimal media for 4.5 hours to induce effector production and secretion. Bacteria were  
477 pelleted and then suspended in laemmli buffer and incubated at 95 degrees Celsius for three  
478 minutes to lyse the cells. Freshly boiled samples were loaded onto a 4-6% gradient gel and run  
479 for several hours to ensure sufficient separation of the different sized TAL effectors.

## 480 **Gene Expression Analysis**

481 Susceptible cotton were inoculated with *Xcm* using a needleless syringe at an OD<sub>600</sub> of  
482 0.5. Infected and mock-treated tissue were collected and flash frozen at 24 and 48 hours post  
483 inoculation. RNA was extracted using the Sigma tRNA kit. RNA-sequencing libraries were  
484 generated as previously described [74].

485 Raw reads were trimmed using Trimmomatic [63]. The Tuxedo Suite was used for  
486 mapping reads to the TM-1 NBI *Gossypium hirsutum* genome [75], assembling transcripts, and  
487 quantifying differential expression [27].

488 Read mapping identified several mis-annotated SWEET genes that skewed differential  
489 expression results. The annotations of SWEET genes Gh\_A12G1747, Gh\_D07G0487, and  
490 Gh\_D12G1898 were shortened to exclude 20-30kb introns. Two exons were added to  
491 Gh\_D05G1488. The 2.7kb scaffold named Scaffold013374 was also removed from analysis  
492 because its gene Gh\_Sca013374G01 has exact sequence homology to Gh\_A12G1747 and  
493 created multi-mapped reads that interfered with expression analysis.

494 Homeologous pairs were identified based on syntenic regions with MCScan [76]. A  
495 syntenic region was defined as a region with a minimum of five genes with an average  
496 intergenic distance of two and within extended distance of 40. All other values were set to the  
497 default. Comparisons between homeologs was performed by examining cuffdiff differential  
498 expression and classifying them according to the sub-genome expression pattern. Genes  
499 considered up or down regulated meet both differential expression from mock significance of  
500 q-value < 0.05 and the absolute value of the log<sub>2</sub> fold change is greater than 2.

## 501 **TAL Binding Sites**



502 Bioinformatic prediction of TAL effector binding sites on the *G. hirsutum* promoterome  
503 was performed using the TAL Effector-Nucleotide Targeter (TALEnt) [50]. In short, the regions of  
504 the genome that were within 300 basepairs of annotated genes were queried with the RVD's of  
505 MS14003 and AR81009 using a cutoff score of 4. Promiscuously binding TALs 16 from MS14003  
506 and 16a from AR81009 were removed from analysis.

507

## 508 Acknowledgements

509 The authors would like to acknowledge Dr. Robert Nichols for useful discussions  
510 throughout the presented research and preparation of this manuscript.

511

## 512 References

- 513 1. Cotton: World Markets and Trade [Internet]. 2016 [cited August 2016]. Available from:  
514 <http://apps.fas.usda.gov/psdonline/circulars/cotton.pdf>.
- 515 2. World Agricultural Supply and Demand Estimates [Internet]. 2016 [cited August 12, 2016].  
516 Available from: <http://usda.mannlib.cornell.edu/usda/current/wasde/wasde-08-12-2016.pdf>.
- 517 3. Blank LM, Bird LS. Breeding Strains of Cotton Resistant to Bacterial Blight. Texas: Texas  
518 Agricultural Experiment Station; 1951. p. 1-25.
- 519 4. Green JM, Brinkerhoff LA. Inheritance of Three Genes for Bacterial Blight Resistance in Upland  
520 Cotton1. *Agronomy Journal*. 1956;48(11):481-5. doi: 10.2134/agronj1956.00021962004800110001x.
- 521 5. Simpson D, Weindling R. Bacterial blight resistance in a strain of Stoneville cotton. *Journal of the*  
522 *American Society of Agronomy*. 1946.
- 523 6. Huang X, Zhai J, Luo Y, Rudolph K. Identification of a highly virulent strain of *Xanthomonas*  
524 *axonopodis* pv. *malvacearum*. *European Journal of Plant Pathology*. 2008;122(4):461-9. doi:  
525 10.1007/s10658-008-9312-3.
- 526 7. Cunnac S, Bolot S, Forero Serna N, Ortiz E, Szurek B, Noel LD, et al. High-Quality Draft Genome  
527 Sequences of Two *Xanthomonas citri* pv. *malvacearum* Strains. *Genome Announc*. 2013;1(4). doi:  
528 10.1128/genomeA.00674-13. PubMed PMID: 23990578; PubMed Central PMCID: PMC3757453.
- 529 8. Delannoy E, Lyon BR, Marmey P, Jalloul A, Daniel JF, Montillet JL, et al. Resistance of cotton  
530 towards *Xanthomonas campestris* pv. *malvacearum*. *Annu Rev Phytopathol*. 2005;43:63-82. doi:  
531 10.1146/annurev.phyto.43.040204.140251. PubMed PMID: 16078877.
- 532 9. Brinkerhoff LA. Variation in *Xanthomonas malvacearum* and its relation to control. *Annu Rev*  
533 *Phytopathol*. 1970;8:85-110.
- 534 10. Verma JP. *Bacterial Blight of Cotton*. CRC Press 1986.
- 535 11. Hunter RE, Brinkerhoff LA, Bird LS. The Development of a Set of Upland Cotton Lines for  
536 Differentiating Races of *Xanthomonas malvacearum*. *Phytopathology*. 1968;58:830-2.
- 537 12. Baldwin Jr C, editor Report of the Bacterial Blight Committee--1975 [Cotton, USA]. *Proceedings*  
538 *Beltwide Cotton Production Research Conferences*; 1976.

- 539 13. Essenberg M, Bayles MB, Pierce ML, Verhalen LM. Pyramiding B genes in cotton achieves  
540 broader but not always higher resistance to bacterial blight. *Phytopathology*. 2014;104(10):1088-97. doi:  
541 10.1094/PHYTO-06-13-0167-R. PubMed PMID: 24655289.
- 542 14. Gabriel DW, Burges A, Lazo GR. Gene-for-gene interactions of five cloned avirulence genes from  
543 *Xanthomonas campestris* pv. *malvacearum* with specific resistance genes in cotton. *Proceedings of the*  
544 *National Academy of Sciences*. 1986;83:6415-9.
- 545 15. Schwartz AR, Potnis N, Timilsina S, Wilson M, Patané J, Martins J, et al. Phylogenomics of  
546 *Xanthomonas* field strains infecting pepper and tomato reveals diversity in effector repertoires and  
547 identifies determinants of host specificity. *Frontiers in Microbiology*. 2015;6. doi:  
548 10.3389/fmicb.2015.00535.
- 549 16. Jacques MA, Arlat M, Boulanger A, Boureau T, Carrere S, Cesbron S, et al. Using Ecology,  
550 Physiology, and Genomics to Understand Host Specificity in *Xanthomonas*. *Annu Rev Phytopathol*.  
551 2016;54:163-87. doi: 10.1146/annurev-phyto-080615-100147. PubMed PMID: 27296145.
- 552 17. Macho AP, Zipfel C. Targeting of plant pattern recognition receptor-triggered immunity by  
553 bacterial type-III secretion system effectors. *Current Opinion in Microbiology*. 2015;23:14-22. doi:  
554 <http://dx.doi.org/10.1016/j.mib.2014.10.009>.
- 555 18. Kim J-G, Stork W, Mudgett Mary B. *Xanthomonas* Type III Effector XopD Desumoylates Tomato  
556 Transcription Factor SIERF4 to Suppress Ethylene Responses and Promote Pathogen Growth. *Cell Host &*  
557 *Microbe*. 2013;13(2):143-54. doi: <http://dx.doi.org/10.1016/j.chom.2013.01.006>.
- 558 19. Wang S, Sun J, Fan F, Tan Z, Zou Y, Lu D. A *Xanthomonas oryzae* pv. *oryzae* effector, XopR,  
559 associates with receptor-like cytoplasmic kinases and suppresses PAMP-triggered stomatal closure.  
560 *Science China Life Sciences*. 2016:1-8. doi: 10.1007/s11427-016-5106-6.
- 561 20. Doyle EL, Stoddard BL, Voytas DF, Bogdanove AJ. TAL effectors: highly adaptable phyto-bacterial  
562 virulence factors and readily engineered DNA-targeting proteins. *Trends Cell Biol*. 2013;23(8):390-8. doi:  
563 10.1016/j.tcb.2013.04.003. PubMed PMID: 23707478; PubMed Central PMCID: PMC3729746.
- 564 21. Streubel J, Pesce C, Hutin M, Koebnik R, Boch J, Szurek B. Five phylogenetically close rice SWEET  
565 genes confer TAL effector-mediated susceptibility to *Xanthomonas oryzae* pv. *oryzae*. *New Phytol*.  
566 2013;200(3):808-19. doi: 10.1111/nph.12411. PubMed PMID: 23879865.
- 567 22. Schreiber KJ, Baudin M, Hassan JA, Lewis JD. Die another day: Molecular mechanisms of  
568 effector-triggered immunity elicited by type III secreted effector proteins. *Seminars in Cell &*  
569 *Developmental Biology*. 2016;56:124-33. doi: <http://dx.doi.org/10.1016/j.semdb.2016.05.001>.
- 570 23. Lee HA, Yeom SI. Plant NB-LRR proteins: tightly regulated sensors in a complex manner. *Brief*  
571 *Funct Genomics*. 2015;14(4):233-42. doi: 10.1093/bfpg/elv012. PubMed PMID: 25825425.
- 572 24. Flor HH. Current Status of the Gene-for-Gene Concept. *Annu Rev Phytopathol*. 1971;9:275-96.
- 573 25. Cui H, Tsuda K, Parker JE. Effector-Triggered Immunity: From Pathogen Perception to Robust  
574 Defense. *Annual Review of Plant Biology*. 2015;66(1):487-511. doi: 10.1146/annurev-arplant-050213-  
575 040012.
- 576 26. Koch R. Untersuchungen ueber Bakterien V. Die Aetiologie der Milzbrand-Krankheit,  
577 begruendend auf die Entwicklungsgeschichte des *Bacillus Anthracis*. *Beitr. z. Biol. D. Pflanzen* 2: 277-310.  
578 *Milestones in Microbiology*. 1876;1556.
- 579 27. Trapnell C, Roberts A, Goff L, Pertea G, Kim D, Kelley DR, et al. Differential gene and transcript  
580 expression analysis of RNA-seq experiments with TopHat and Cufflinks. *Nat Protoc*. 2012;7(3):562-78.  
581 doi: 10.1038/nprot.2012.016. PubMed PMID: 22383036; PubMed Central PMCID: PMC3334321.
- 582 28. Li H, Handsaker B, Wysoker A, Fennell T, Ruan J, Homer N, et al. The Sequence Alignment/Map  
583 format and SAMtools. *Bioinformatics*. 2009;25(16):2078-9. doi: 10.1093/bioinformatics/btp352.
- 584 29. Bart R, Cohn M, Kassen A, McCallum EJ, Shybut M, Petriello A, et al. High-throughput genomic  
585 sequencing of cassava bacterial blight strains identifies conserved effectors to target for durable

- 586 resistance. Proceedings of the National Academy of Sciences. 2012;109(32):13130-. doi:  
587 10.1073/pnas.1211014109.
- 588 30. Dever JK, Wheeler TA, Boman RK, Kerns D, Foster M, Nesmith D, et al. Cotton Performance Tests  
589 in the Texas High Plains and Trans Pecos Areas of Texas --2009. Texas AgriLife Research and Extension  
590 Service Center. 2010;10(2):1-74.
- 591 31. Dever JK, Morgan V, Kelly CM, Wheeler TA, Elkins H, Mendoza V, et al. Cotton Performance Tests  
592 in the Texas High Plains, 2014. Texas AgriLife Research and Extension Service Center. 2015;15(1).
- 593 32. Organization CSaIR, inventorCotton Variety Fibermax 9892004 March 3, 2004.
- 594 33. Tyagi P, Gore MA, Bowman DT, Campbell BT, Udall JA, Kuraparthi V. Genetic diversity and  
595 population structure in the US Upland cotton (*Gossypium hirsutum* L.). Theor Appl Genet.  
596 2014;127(2):283-95. doi: 10.1007/s00122-013-2217-3. PubMed PMID: 24170350.
- 597 34. Wheeler TA, Woodward JE. Response of cotton varieties to bacterial blight race 18 ain 2016.  
598 Texas AgriLife Research and Extension Service Center. 2016. doi:  
599 Lubbock.tamu.edu/files/2016/12/Bacterial-blight-trials-2016-2.pdf.
- 600 35. Wheeler TA, Woodward JE. Response of cotton varieties to diseases on the Texas High Plains.  
601 Texas AgriLife Research and Extension Service Center. 2012. doi: Lubbock.tamu.edu/files/2013/02/2012-  
602 cotton-disease-ratings.pdf.
- 603 36. Wheeler TA, Woodward JE. Response of cotton varieties to diseases on the Southern High Plains  
604 of Texas, 2010. Texas AgriLife Research and Extension Service Center. 2010. doi:  
605 Lubbock.tamu.edu/files/2011/11/DiseaseRecommendations.pdf.
- 606 37. Wheeler TA, Sagram US, Schuster GL, Gannaway JR. Identification of Factors that Influence  
607 Screening for Bacterial Blight Resistance. The Journal of Cotton Science. 2007;11(2):91-7. doi:  
608 <http://www.cotton.org/journal/2007-11/2/upload/jcs11-91.pdf>
- 609 38. Woodward JE, Wheeler TA. Bacterial Blight Update for Cotton on the High Plains 2015. Available  
610 from: <http://plantclinic.tamu.edu/files/2015/08/WoodwardWheeler2015.pdf>.
- 611 39. Darling AE, Mau B, Perna NT. progressiveMauve: Multiple Genome Alignment with Gene Gain,  
612 Loss and Rearrangement. PLOS ONE. 2010;5(6):e11147. doi: 10.1371/journal.pone.0011147.
- 613 40. Cohn M, Bart RS, Shybut M, Dahlbeck D, Gomez M, Morbitzer R, et al. Xanthomonas axonopodis  
614 virulence is promoted by a transcription activator-like effector-mediated induction of a SWEET sugar  
615 transporter in cassava. Mol Plant Microbe Interact. 2014;27(11):1186-98. doi: 10.1094/MPMI-06-14-  
616 0161-R. PubMed PMID: 25083909.
- 617 41. Grau J, Reschke M, Erkes A, Streubel J, Morgan RD, Wilson GG, et al. AnnoTALE: bioinformatics  
618 tools for identification, annotation, and nomenclature of TALEs from Xanthomonas genomic sequences.  
619 Sci Rep. 2016;6:21077. doi: 10.1038/srep21077. PubMed PMID: 26876161; PubMed Central PMCID:  
620 PMC4753510.
- 621 42. Büschges R, Hollricher K, Panstruga R, Simons G, Wolter M, Frijters A, et al. The Barley Mlo  
622 Gene: A Novel Control Element of Plant Pathogen Resistance. Cell. 1997;88(5):695-705. doi:  
623 [http://dx.doi.org/10.1016/S0092-8674\(00\)81912-1](http://dx.doi.org/10.1016/S0092-8674(00)81912-1).
- 624 43. Jarosch B, Kogel K-H, Schaffrath U. The Ambivalence of the Barley Mlo Locus: Mutations  
625 Conferring Resistance Against Powdery Mildew (*Blumeria graminis* f. sp. hordei) Enhance Susceptibility  
626 to the Rice Blast Fungus *Magnaporthe grisea*. Molecular Plant-Microbe Interactions. 1999;12(6):508-14.  
627 doi: 10.1094/MPMI.1999.12.6.508.
- 628 44. Jørgensen IH. Discovery, characterization and exploitation of Mlo powdery mildew resistance in  
629 barley. Euphytica. 1992;63(1):141-52. doi: 10.1007/BF00023919.
- 630 45. Kim DS, Hwang BK. The pepper MLO gene, CaMLO2, is involved in the susceptibility cell-death  
631 response and bacterial and oomycete proliferation. The Plant Journal. 2012;72(5):843-55. doi:  
632 10.1111/tpj.12003.

- 633 46. Dong S, Adams KL. Differential contributions to the transcriptome of duplicated genes in  
634 response to abiotic stresses in natural and synthetic polyploids. *New Phytol.* 2011;190(4):1045-57. doi:  
635 10.1111/j.1469-8137.2011.03650.x. PubMed PMID: 21361962.
- 636 47. Chen LQ. SWEET sugar transporters for phloem transport and pathogen nutrition. *New Phytol.*  
637 2014;201(4):1150-5. PubMed PMID: 24649486.
- 638 48. Verdier V, Triplett LR, Hummel AW, Corral R, Cernadas RA, Schmidt CL, et al. Transcription  
639 activator-like (TAL) effectors targeting OsSWEET genes enhance virulence on diverse rice (*Oryza sativa*)  
640 varieties when expressed individually in a TAL effector-deficient strain of *Xanthomonas oryzae*. *The New*  
641 *phytologist.* 2012;196(4):1197-207. doi: 10.1111/j.1469-8137.2012.04367.x. PubMed PMID: 23078195.
- 642 49. Doyle EL, Booher NJ, Standage DS, Voytas DF, Brendel VP, VanDyk JK, et al. TAL Effector-  
643 Nucleotide Targeter (TALE-NT) 2.0: tools for TAL effector design and target prediction. *Nucleic Acids*  
644 *Research.* 2012;40(W1):W117-W22.
- 645 50. Allen T. ALERT Bacterial Blight of Cotton 2011 [updated July 15, 2011]. Available from:  
646 <http://www.mississippi-crops.com/2011/07/15/alert-bacterial-blight-of-cotton/>.
- 647 51. Aaron S. Alexander JEW, Randal K. Boman, Terry A. Wheeler, Norman W. Hopper. Effect of the  
648 Easiflo Cottonseed Processing Method on Recovery of *Xanthomonas axonopodis* pv. *malvacearum*. *The*  
649 *Texas Journal of Agriculture and Natural Resource.* 2012;25:13-23.
- 650 52. Allen TW. Epidemiology of Bacterial Blight of Cotton: 2011 to 2015. 2016 Cotton Incorporated -  
651 Bacterial Blight Review. 2016.
- 652 53. Kemerait B. Cotton bacterial blight is back and this is what you need to know 2016 [updated  
653 August 10, 2016]. Available from: [http://southeastfarmpress.com/cotton/cotton-bacterial-blight-back-](http://southeastfarmpress.com/cotton/cotton-bacterial-blight-back-and-what-you-need-know)  
654 [and-what-you-need-know](http://southeastfarmpress.com/cotton/cotton-bacterial-blight-back-and-what-you-need-know).
- 655 54. Li T, Liu B, Spalding MH, Weeks DP, Yang B. High-efficiency TALEN-based gene editing produces  
656 disease-resistant rice. *Nature Biotechnology.* 2012;30(5):390-2. doi: 10.1038/nbt.2199. PubMed PMID:  
657 22565958.
- 658 55. Jia H, Orbovic V, Jones JB, Wang N. Modification of the PthA4 effector binding elements in Type I  
659 CsLOB1 promoter using Cas9/sgRNA to produce transgenic Duncan grapefruit alleviating  
660 XccDeltaphA4:dCsLOB1.3 infection. *Plant Biotechnol J.* 2016;14(5):1291-301. doi: 10.1111/pbi.12495.  
661 PubMed PMID: 27071672.
- 662 56. Strauß T, van Poecke RMP, Strauß A, Römer P, Minsavage GV, Singh S, et al. RNA-seq pinpoints a  
663 *Xanthomonas* TAL-effector activated resistance gene in a large-crop genome. *Proceedings of the*  
664 *National Academy of Sciences.* 2012;109(47):19480-5.
- 665 57. Yang B, Sugio A, White FF. Os8N3 is a host disease-susceptibility gene for bacterial blight of rice.  
666 *Proceedings of the National Academy of Sciences.* 2006;103(27):10503-8.
- 667 58. Chu Z, Yuan M, Yao J, Ge X, Yuan B, Xu C, et al. Promoter mutations of an essential gene for  
668 pollen development result in disease resistance in rice. *Genes & Development.* 2006;20(10):1250-5. doi:  
669 10.1101/gad.1416306.
- 670 59. Yoo M-J, Wendel JF. Comparative Evolutionary and Developmental Dynamics of the Cotton  
671 (*Gossypium hirsutum*) Fiber Transcriptome. *PLoS Genet.* 2014;10(1):e1004073. doi:  
672 10.1371/journal.pgen.1004073.
- 673 60. Janga MR, Campbell LM, Rathore KS. CRISPR/Cas9-mediated targeted mutagenesis in upland  
674 cotton (*Gossypium hirsutum* L.). *Plant Molecular Biology.* 2017;1-12. doi: 10.1007/s11103-017-0599-3.
- 675 61. Li C, Unver T, Zhang B. A high-efficiency CRISPR/Cas9 system for targeted mutagenesis in Cotton  
676 (*Gossypium hirsutum* L.). *Sci Rep.* 2017;7:43902. doi: 10.1038/srep43902. PubMed PMID: 28256588;  
677 PubMed Central PMCID: PMC5335549.
- 678 62. Weisburg WG, Barns SM, Pelletier DA, Lane DJ. 16S ribosomal DNA amplification for  
679 phylogenetic study. *Journal of bacteriology.* 1991;173(2):697-703. PubMed PMID: 1987160.

- 680 63. Bolger AM, Lohse M, Usadel B. Trimmomatic: a flexible trimmer for Illumina sequence data.  
681 Bioinformatics. 2014;30(15):2114-20. doi: 10.1093/bioinformatics/btu170. PubMed PMID: 24695404;  
682 PubMed Central PMCID: PMC4103590.
- 683 64. Bankevich A, Nurk S, Antipov D, Gurevich AA, Dvorkin M, Kulikov AS, et al. SPAdes: A New  
684 Genome Assembly Algorithm and Its Applications to Single-Cell Sequencing. Journal of Computational  
685 Biology. 2012;19(5):455-77. doi: 10.1089/cmb.2012.0021.
- 686 65. Seemann T. Prokka: rapid prokaryotic genome annotation. Bioinformatics. 2014;30(14):2068-9.
- 687 66. Almeida NF, Yan S, Cai R, Clarke CR, Morris CE, Schaad NW, et al. PAMDB, a multilocus sequence  
688 typing and analysis database and website for plant-associated microbes. Phytopathology.  
689 2010;100(3):208-15. doi: 10.1094/PHYTO-100-3-0208. PubMed PMID: 20128693.
- 690 67. Danecek P, Auton A, Abecasis G, Albers CA, Banks E, DePristo MA, et al. The variant call format  
691 and VCFtools. Bioinformatics. 2011;27(15):2156-8. doi: 10.1093/bioinformatics/btr330.
- 692 68. Quinlan AR, Hall IM. BEDTools: a flexible suite of utilities for comparing genomic features.  
693 Bioinformatics. 2010;26(6):841-2. doi: 10.1093/bioinformatics/btq033.
- 694 69. Larkin MA, Blackshields G, Brown NP, Chenna R, McGettigan PA, McWilliam H, et al. Clustal W  
695 and Clustal X version 2.0. Bioinformatics. 2007;23(21):2947-8. doi: 10.1093/bioinformatics/btm404.
- 696 70. Saitou N, Nei M. The neighbor-joining method: a new method for reconstructing phylogenetic  
697 trees. Molecular Biology and Evolution. 1987;4(4):406-25. doi: 10.1093/oxfordjournals.molbev.a040454.
- 698 71. Chin C-S, Peluso P, Sedlazeck FJ, Nattestad M, Concepcion GT, Clum A, et al. Phased diploid  
699 genome assembly with single-molecule real-time sequencing. Nat Meth. 2016;13(12):1050-4. doi:  
700 10.1038/nmeth.4035
- 701 72. Camacho C, Coulouris G, Avagyan V, Ma N, Papadopoulos J, Bealer K, et al. BLAST+: architecture  
702 and applications. BMC Bioinformatics. 2009;10:421. doi: 10.1186/1471-2105-10-421. PubMed PMID:  
703 20003500; PubMed Central PMCID: PMC2803857.
- 704 73. Krzywinski M, Schein J, Birol I, Connors J, Gascoyne R, Horsman D, et al. Circos: an information  
705 aesthetic for comparative genomics. Genome Res. 2009;19(9):1639-45. doi: 10.1101/gr.092759.109.  
706 PubMed PMID: 19541911; PubMed Central PMCID: PMC2752132.
- 707 74. Wilson MC, Mutka AM, Hummel AW, Berry J, Chauhan RD, Vijayaraghavan A, et al. Gene  
708 expression atlas for the food security crop cassava. New Phytol. 2017;213(4). doi: 10.1111/nph.14443.  
709 PubMed PMID: 28116755.
- 710 75. Zhang T, Hu Y, Jiang W, Fang L, Guan X, Chen J, et al. Sequencing of allotetraploid cotton  
711 (*Gossypium hirsutum* L. acc. TM-1) provides a resource for fiber improvement. Nat Biotechnol.  
712 2015;33(5):531-7. doi: 10.1038/nbt.3207. PubMed PMID: 25893781.
- 713 76. Tang H, Bowers JE, Wang X, Ming R, Alam M, Paterson AH. Synteny and Collinearity in Plant  
714 Genomes. Science. 2008;320(5875):486.

## 715 **Figure Legends**

716 **Fig 1: Cotton Bacterial Blight (CBB) symptoms and reemergence across the southern United**  
717 **States.** (Left) Typical CBB symptoms present in cotton fields near Lubbock, TX during the 2015  
718 growing season include angular leaf spots, boll rot, and black arm rot. Yellow shading within  
719 world map (top) indicates origin of strains included in this study. Acres of cotton planted per  
720 county in the United States in 2015 (blue) and counties with confirmed CBB in 2015 (red  
721 outline). Statistics on the area of cotton planted in the U.S. were acquired from the USDA. CBB



722 was reported by extension agents, extension specialists, and certified crop advisers in their  
723 respective states.

724 **Table 1: Illumina and SMRT sequenced *Xcm* genomes described in this paper.**

725 **Fig 2: Phylogenetic analysis of *Xcm* isolates and 13 species of *Xanthomonas*** A) MLST (Multi  
726 Locus Sequence Typing) and maximum likelihood analysis of 13 Illumina sequenced *Xcm*  
727 isolates (this paper) and 40 other *Xanthomonads* using concatenated sections of the *gltA*, *lepA*,  
728 *lacF*, *gyrB*, *fusA* and *gap-1* loci. B) SNP based neighbor-joining tree generated from 17,853  
729 variable loci between 13 *Xcm* isolates and the reference genome *Xanthomonas citri* subsp. *citri*  
730 strain Aw12879. The tree was made using the Simple Phylogeny tool from ClustalW2.

731 **Fig 3: Molecular and phenotypic analysis of *Xcm* and *G. hirsutum* interactions.** A) Type three  
732 effector profiles of *Xcm* isolates were deduced from *de novo*, Illumina based genome  
733 assemblies. Effector presence or absence was determined based on homology to known type  
734 three effectors using the program Prokka. B) Commercial and public *G. hirsutum* cultivars were  
735 inoculated with 13 *Xcm* isolates. Susceptible (S) indicates water soaking symptoms. Resistant  
736 (R) indicates a visible hypersensitive response. Plants were screened with a range of inoculum  
737 concentration from OD<sub>600</sub> = 0.001-0.5. C) Disease symptoms on *G. hirsutum* cultivars Stoneville  
738 5288 B2F and DES 56 after inoculation with *Xcm* strain AR81009 (OD<sub>600</sub> = 0.05). Symptoms are  
739 visualized under visible (VIS) and near infrared (NIR) light. D) The proportion of US fields  
740 planted with susceptible and resistant cultivars of *G. hirsutum* was determined using planting  
741 acreage statistics from the USDA-AMA and disease phenotypes based on previous reports for  
742 common cultivars [34-36].

743 **Fig 4: SMRT sequencing of two phenotypically and geographically diverse *Xcm* isolates:**

744 **MS14003 and AR81009.** Circos plot visualization of two circular *Xcm* genomes. Tracks are as  
745 follows from inside to outside: synteny of gene models; GC Content; DNA Methylation on + and  
746 – strands; location of type three effectors (teal) and TAL effectors (red), and position. On each  
747 side, accompanying plasmids are cartooned. Type three effector repertoires and the type IV  
748 secretion systems were annotated using Prokka. Homologous regions greater than 1kb were  
749 identified using MAUVE, and TAL effectors were annotated using AnnoTALE.

750 **Fig 5: SMRT sequencing and western blot reveal diverse TAL effector repertoires between**  
751 ***Xcm* strains MS14003 and AR81009.** Western Blot of TAL effectors using polyclonal TAL-specific  
752 antibody and gene models of TAL effectors identified by AnnoTALE. Blue and Green highlighted  
753 gene models represent TALs grouped in the same clade by repeat variable di-residue (RVD)  
754 sequence using AnnoTALE.

755 **Fig 6: RNA-Sequencing analysis of infected *G. hirsutum* tissue demonstrates transcriptional**  
756 **changes during CBB.** A) Disease phenotypes of *Xcm* strains MS14003 and AR81009 on *G.*  
757 *hirsutum* cultivars Acala Maxxa and DES 56, 7 days post inoculation. B) Acala Maxxa and DES 56  
758 were inoculated with *Xcm* strains MS14003 and AR81009 at an OD of 0.5 and a mock treatment  
759 of 10mM MgCl<sub>2</sub>. Inoculated leaf tissue was collected at 24 and 48 hpi (before disease symptoms  
760 emerged). C) Venn diagram of upregulated *G. hirsutum* genes (Log<sub>2</sub>(fold change in FPKM) ≥ 2  
761 and p value ≤ 0.05) in response to *Xcm* inoculation. Venn diagram was created using the  
762 VennDiagram package in R.

763 **Table 2: Homeologous pairs of *Gossypium hirsutum* genes upregulated in Acala Maxxa and**  
764 **DES 56 after inoculation with *Xcm* strains MS14003 and AR81009.**

765 **Fig 7: Expression of homeologous pairs across the A and D *G. hirsutum* genomes in response**  
766 **to *Xcm* inoculation.** Genes are considered up or down regulated if the absolute value of gene  
767 expression change after inoculation as compared to mock treatment was Log<sub>2</sub>(fold change in  
768 FPKM) ≥ 2 and p value ≤ 0.05. By these criteria, pink shading indicates no significant gene  
769 expression change. A-D-: both members of the homeologous gene pair are down regulated; A-  
770 D0: only the 'A' sub-genome homeolog is down regulated; A-D+: 'A' sub-genome homeolog is  
771 down regulated, 'D' sub-genome homeolog is upregulated; etc. Number of gene pairs (n)  
772 meeting each expression pattern is indicated within the grey bar. For all genes meeting each  
773 expression pattern, the distribution of expression patterns is displayed as a box plot. Rectangles  
774 indicate the interquartile range and the whiskers show 1.5 times the interquartile range. A)  
775 Acala Maxxa inoculated with MS14003 B) DES 56 inoculated with MS14003 C) Acala Maxxa  
776 inoculated with AR 81009 D) DES 56 inoculated with AR81009.

777 **Fig 8: Three candidate *G. hirsutum* susceptibility genes are targeted by two different *Xcm***  
778 **strains.** A) The homeologous pair of SWEET genes A04\_G0861 and D04\_G1360 are upregulated

779 in the presence of *Xcm* strain MS14003. (top) Cartoon summary of 300bp promoters of  
780 A04\_G0861 and D04\_G1360. (bottom) Heat-map of the expressions of A04\_G0861 and  
781 D04\_G1360 48 hours after mock or *Xcm* inoculation. B) The SWEET gene D12\_G1898 is  
782 upregulated in the presence of *Xcm* strain AR81009. (top) Cartoon summary of 300bp  
783 promoters of D12\_G1898 and A12\_G1747. (bottom) Heat-map of the expressions of  
784 A12\_G1747 and D12\_G1898 48 hours after mock or *Xcm* inoculation. TAL effector binding sites  
785 were predicted with TALEsf using a quality score cutoff of 4. Gene promoter cartoon legend:  
786 Arrow: TAL effector binding site; Black dot: Deletion; Black bar: SNP; Pink bar: TATA box; Teal  
787 section: 5'UTR.

788

## 789 **Supporting Information Legends**

790

791 **S1 Table: US Counties with reported CBB incidence from 2009 to 2016.**

792 **S2 Table: *Xanthomonas* genomes previously deposited on NCBI that are referenced in this**  
793 **paper.**

794 **S3 Table: Disease phenotypes and percent acreage of commercial *G. hirsutum* varieties**  
795 **planted in the US from 2009-2016.**

796 **S4 Table: RNA-Seq analysis reveals that 52 genes are induced in all *Xcm-G. hirsutum***  
797 **interactions at 48 hours ( $p \leq 0.05$ ) with a  $\text{Log}_2$  (fold change in FPKM)  $\geq 2$ ).**

798 **S1 Fig: Maps of CBB incidence in the US from 2011-2012 and 2014-2016.** CBB incidence was  
799 reported by extension agents, extension specialists and certified crop advisers in their  
800 respective states for the years 2011-2012 and 2014-2016, and compiled by Tom Allen. CBB  
801 reports for 2013 were infrequent.

802 **S2 Fig: Disease phenotypes of historical Race18 strain and MS14003 strain.** *Xcm* strains Race18  
803 and MS14003 were inoculated into *G. hirsutum* variety PHY499 WRF at an OD600 of 0.01 and  
804 imaged at 8 dpi.

805 **S3 Fig: Growth assay of MS14003 and AR81009 on cotton varieties Acala Maxxa and DES 56.**  
806 *G. hirsutum* varieties were inoculated with *Xcm* at an OD600: 0.05. Tissue was collected at day 0  
807 and day 3 and processed as described in materials and methods.



808 **S4 Fig: Expression levels of significantly upregulated genes with a Log2 fold change of 2 in *G.***  
809 ***hirsutum*** A) All significantly upregulated genes with a Log2 fold change of 2 B) All significantly  
810 upregulated genes ( $p \leq 0.05$ ) with a Log2 (fold change in FPKM)  $\geq 2$  that are unique to each  
811 cultivar/*Xcm* disease interaction in *G. hirsutum*. Numbers in grey bar indicate the total number  
812 of genes for each condition.

813 **S5 Fig: Phylogeny of SWEET genes from *Gossypium hirsutum*, *Manihot esculenta*, and**  
814 ***Arabidopsis thaliana*.** Four predicted *G. hirsutum* SWEET genes are compared to classified *A.*  
815 *thaliana* SWEET genes and the MeSWEET10a *M. esculenta* susceptibility gene. A protein  
816 alignment and phylogenetic tree was generated by Clustal Omega, and the tree was visualized  
817 using Figtree v1.4.2.

818 **S6 Fig: Alignment of predicted TAL effector binding sites on induced *G. hirsutum* SWEET**  
819 **genes.** A) TAL M28a is predicted to bind to and up-regulate the homeologous pair of SWEET  
820 genes: A04\_G0861 and D04\_G1360 in *G. hirsutum* varieties Acala Maxxa and DES56 after  
821 inoculation with *Xcm* strain MS14003. B) TAL A14a is predicted to bind to and up-regulate the  
822 SWEET gene D12\_G1898 G1360 in *G. hirsutum* varieties Acala Maxxa and DES56 after  
823 inoculation with *Xcm* strain AR81009.

824

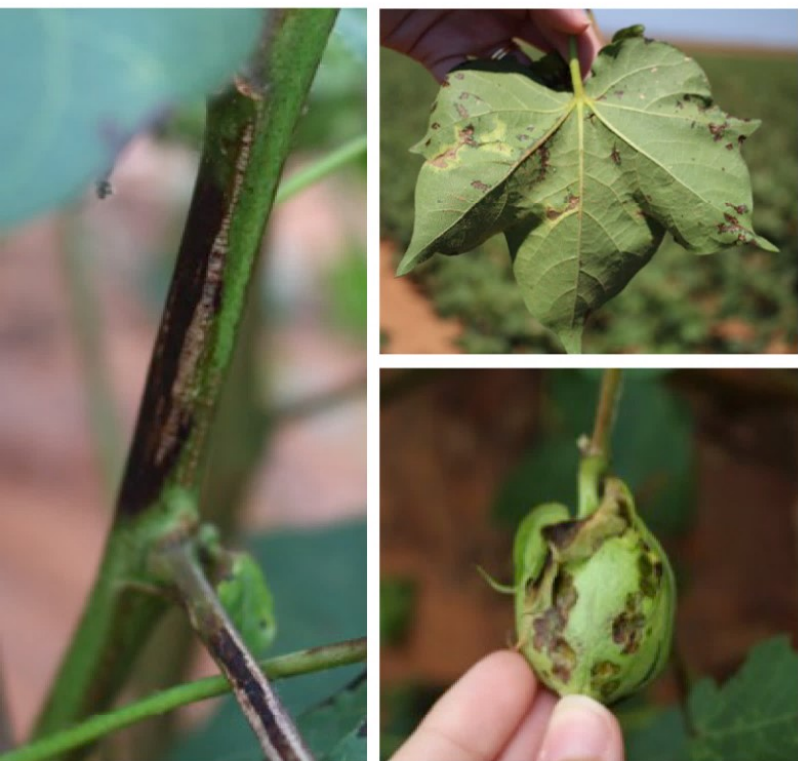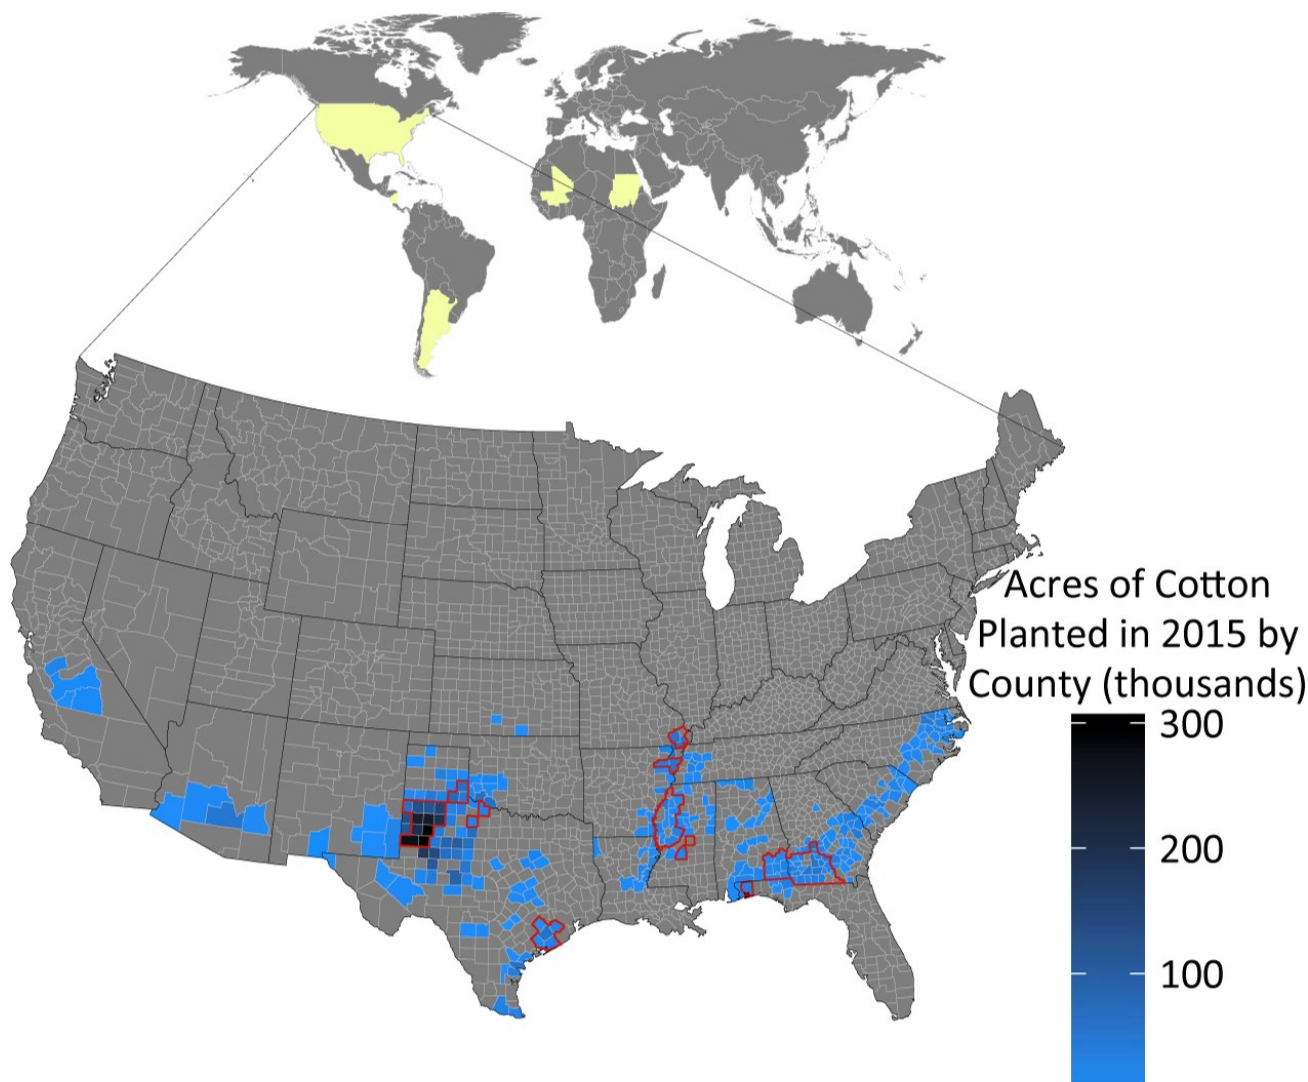

A

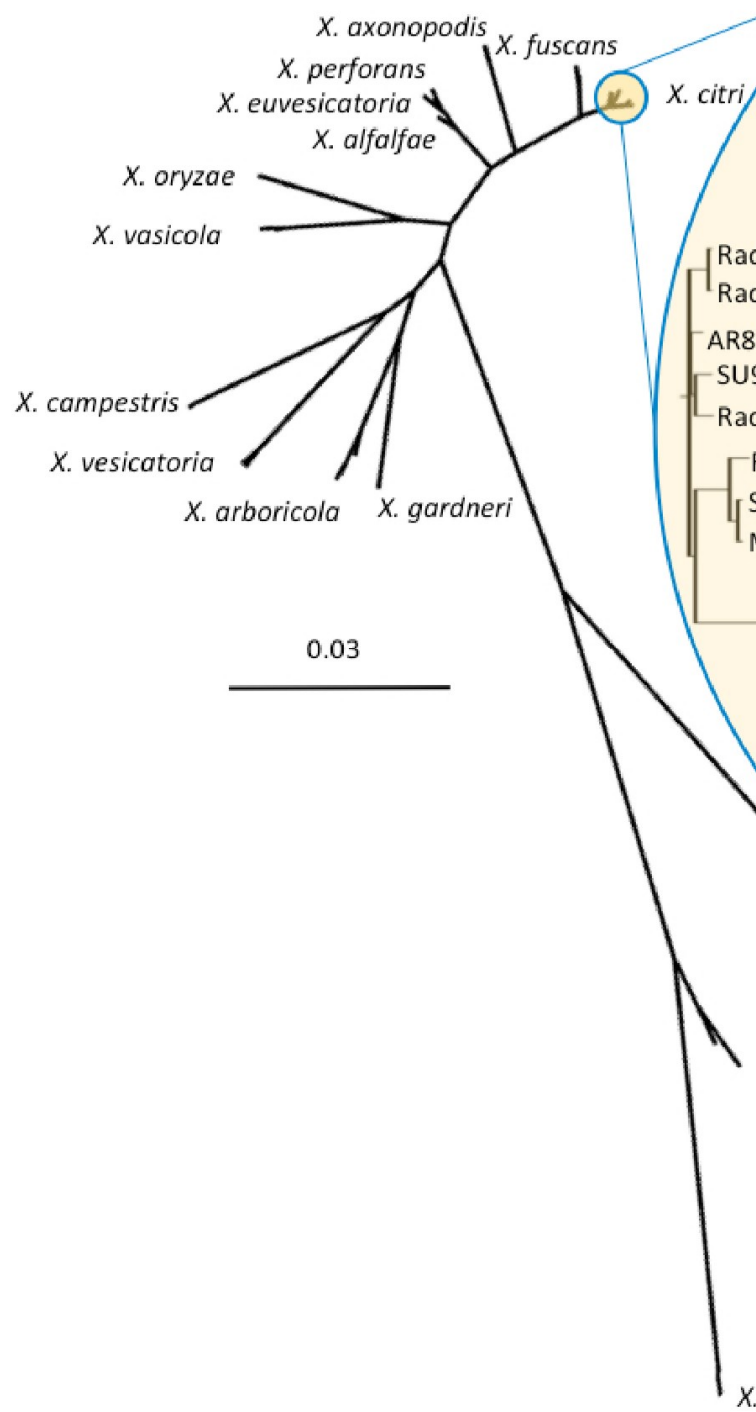

B

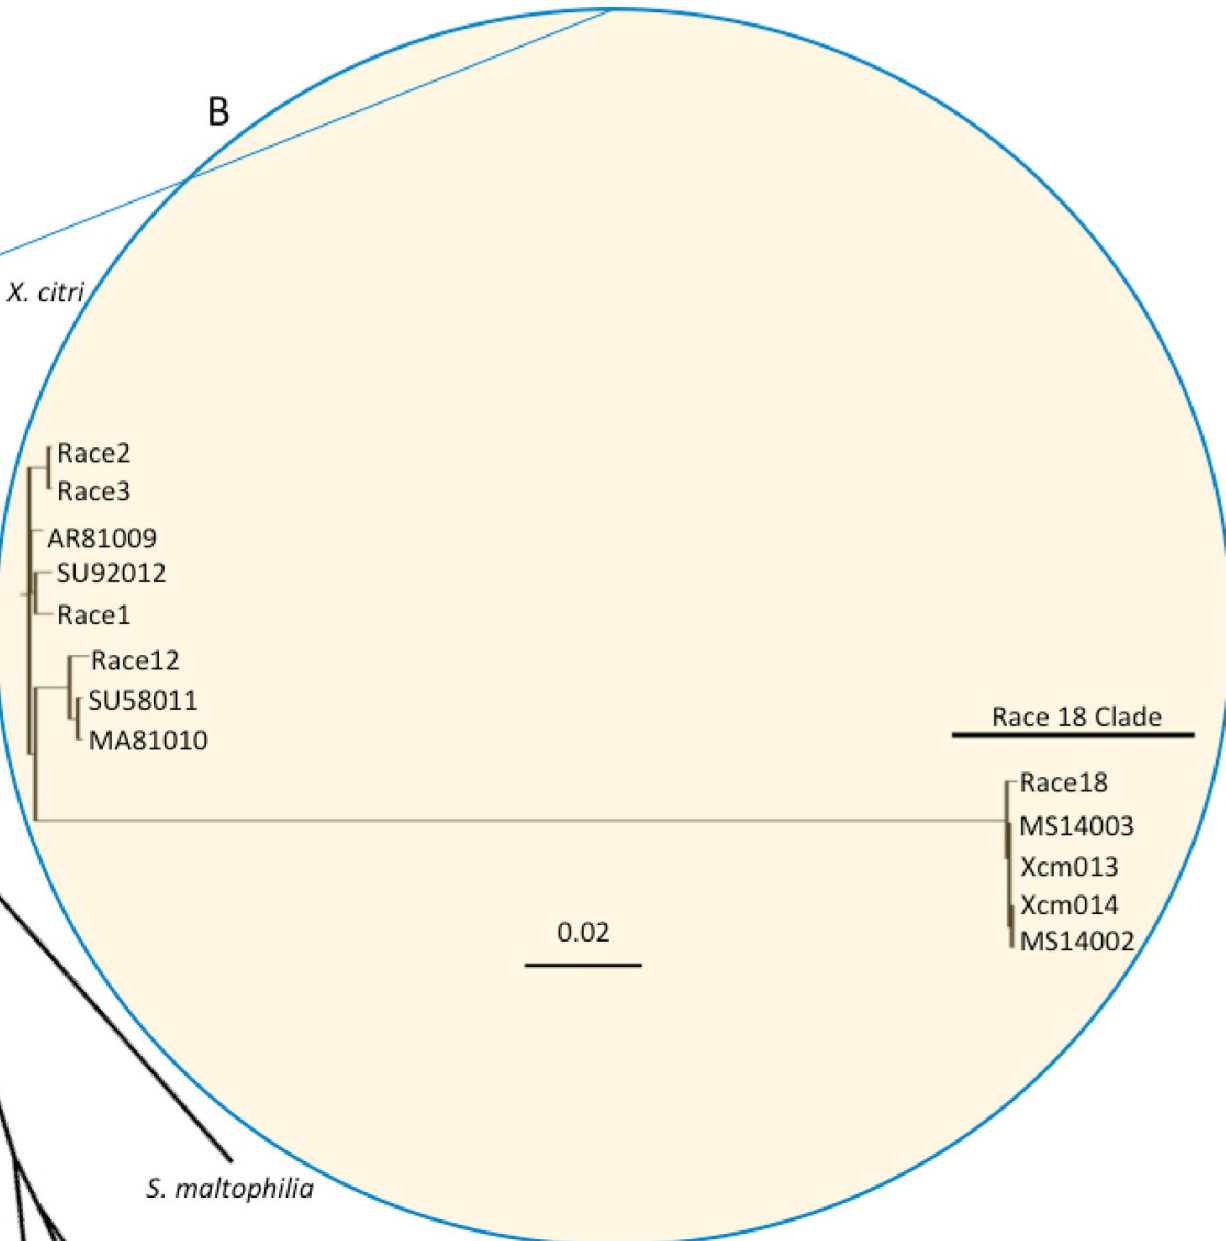

A

| Xcm Strains | Type Three Effectors |                            |              |       |      |       |       |      |       |       |      |       |               |
|-------------|----------------------|----------------------------|--------------|-------|------|-------|-------|------|-------|-------|------|-------|---------------|
|             | Effector Present     | Pseudogene Effector Absent | 24 Conserved | XopAK | XopC | HopA2 | XopE2 | XopJ | XopAI | HopA1 | XopP | XopAO | TAL Effectors |
| SU58011     | +                    | +                          | +            | +     | +    | +     | •     | -    | -     | -     | •    | -     | +             |
| SU92012     | +                    | +                          | +            | +     | +    | +     | •     | -    | •     | •     | •    | -     | +             |
| Race 3      | +                    | +                          | +            | +     | +    | +     | •     | -    | •     | •     | •    | -     | +             |
| Race 12     | +                    | +                          | +            | +     | +    | +     | •     | -    | •     | •     | -    | -     | +             |
| MA81010     | +                    | +                          | +            | +     | +    | •     | -     | -    | •     | •     | -    | -     | +             |
| Xcm004      | +                    | +                          | +            | +     | +    | •     | -     | -    | -     | -     | -    | -     | +             |
| AR81009     | +                    | •                          | +            | •     | +    | +     | -     | -    | •     | •     | +    | -     | +             |
| SU44        | +                    | +                          | +            | •     | +    | +     | -     | -    | •     | •     | +    | +     | +             |
| Race 2      | +                    | +                          | +            | +     | +    | +     | -     | -    | •     | •     | -    | -     | +             |
| BF1         | +                    | +                          | +            | +     | +    | +     | -     | -    | •     | •     | -    | -     | +             |
| NI86        | +                    | +                          | +            | +     | +    | +     | •     | +    | +     | •     | -    | -     | +             |
| MS14002     | +                    | +                          | +            | +     | +    | +     | +     | +    | +     | +     | -    | -     | +             |
| Race 18     | +                    | +                          | +            | +     | +    | +     | +     | +    | +     | +     | -    | -     | +             |
| Xcm014      | +                    | +                          | +            | +     | +    | +     | +     | +    | +     | +     | -    | -     | +             |
| MS14003     | +                    | +                          | +            | +     | +    | +     | +     | +    | +     | +     | -    | -     | +             |
| BF2         | +                    | +                          | +            | +     | +    | +     | +     | +    | +     | +     | -    | -     | +             |

B

|                      | Variety             | R/S |
|----------------------|---------------------|-----|
| Commercial Varieties | Fibermax 989        | R   |
|                      | Fibermax 1830 GLT   | R   |
|                      | Fibermax 2334 GLT   | R   |
|                      | Fibermax 2484 B2F   | R   |
|                      | Deltapine 1133 B2RF | R   |
|                      | Stoneville 5288 B2F | R   |
|                      | Deltapine 0912 B2RF | S   |
|                      | Deltapine 1028 B2RF | S   |
|                      | Deltapine 1034 B2RF | S   |
|                      | Deltapine 1048 B2RF | S   |
| PhytoGen 499 WRF     | S                   |     |
| Stoneville 4946 GLB2 | S                   |     |
| CBB Panel            | Acala-44            | S   |
|                      | Gregg               | S   |
|                      | Mebane              | S   |
| NAM                  | Stoneville 2B       | S   |
|                      | Stoneville 20       | S   |
|                      | Acala-Maxxa         | S   |
|                      | DES 56              | S   |

C

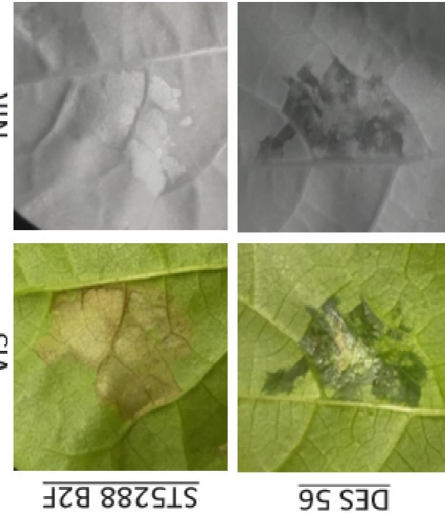

D

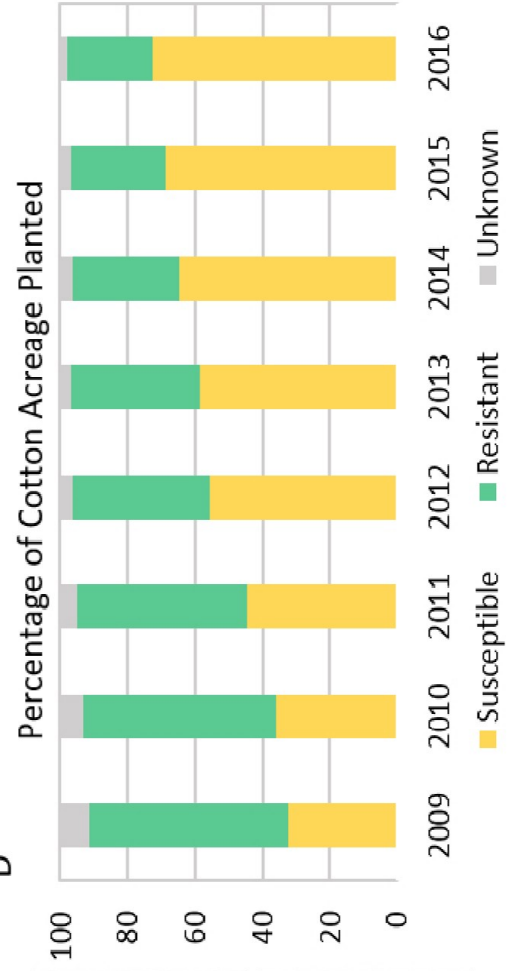



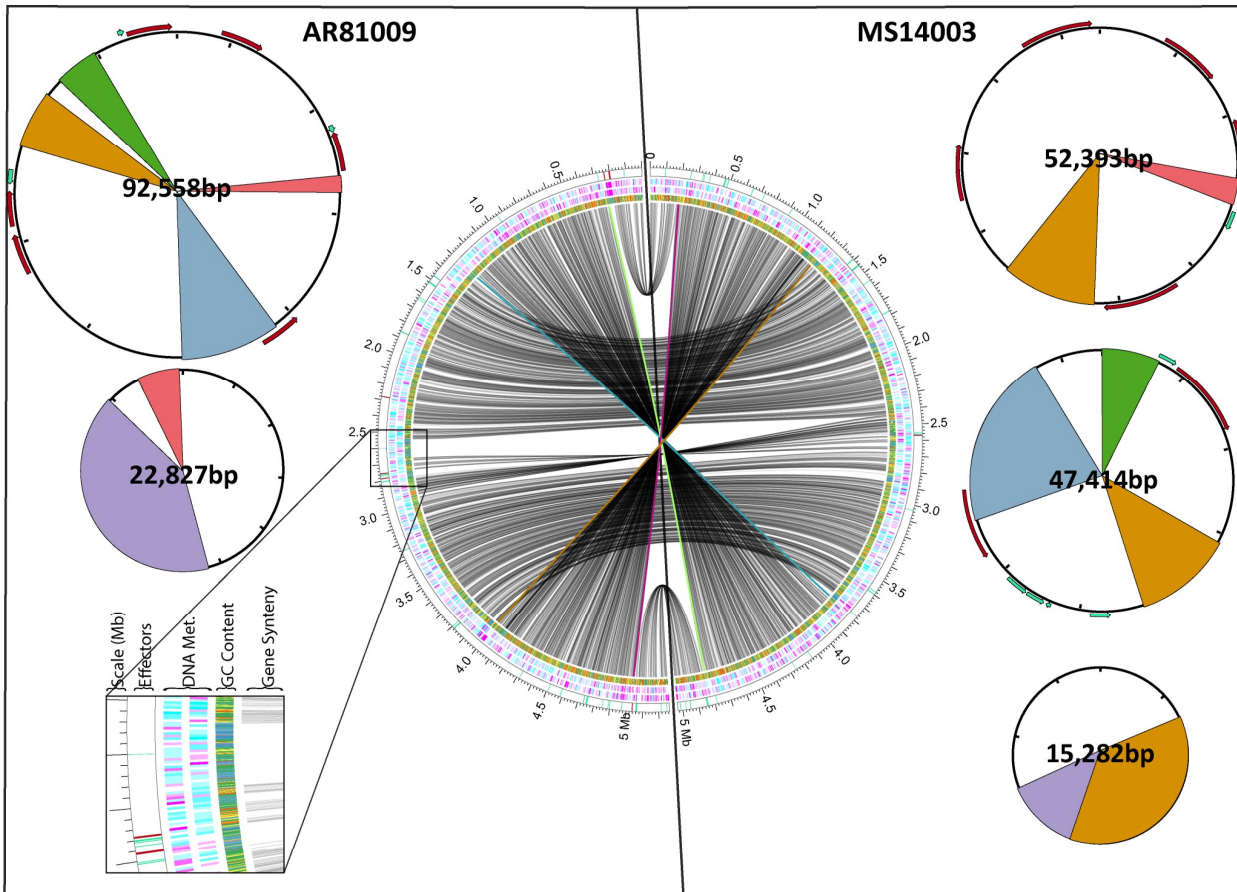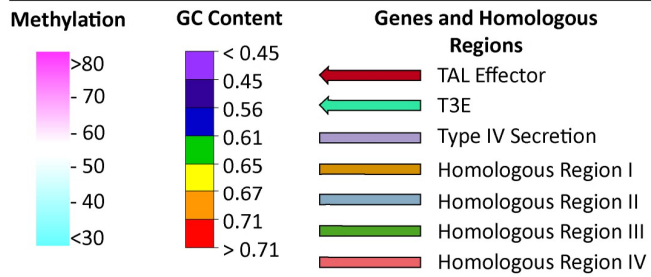

### Gene Model Cartoon

TAL  
Effectors

5' Repeat Region 3'

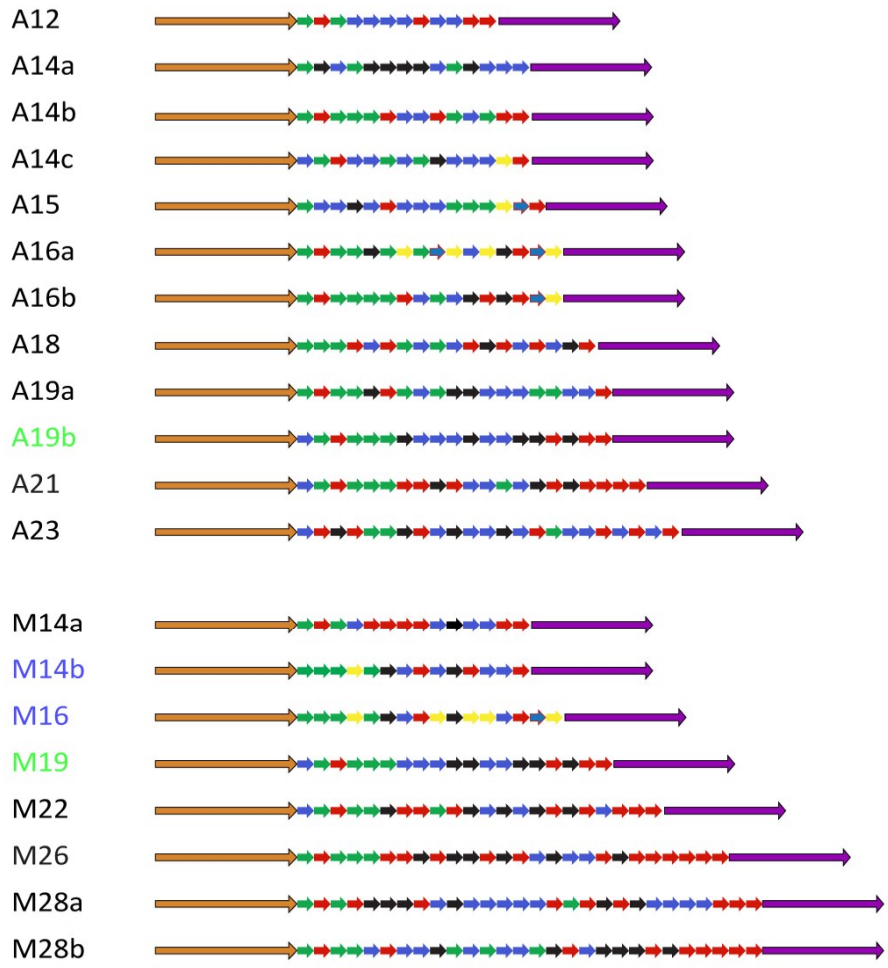

RVD Motif Key

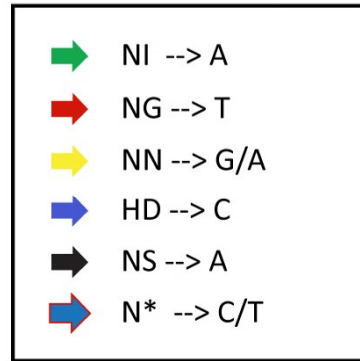

AR81009

AR81 009 MS14 003

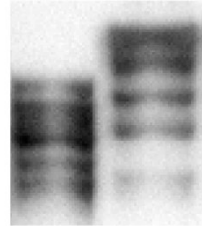

150

100 kDa

MS14003

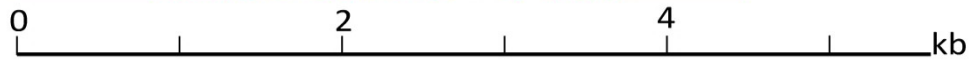

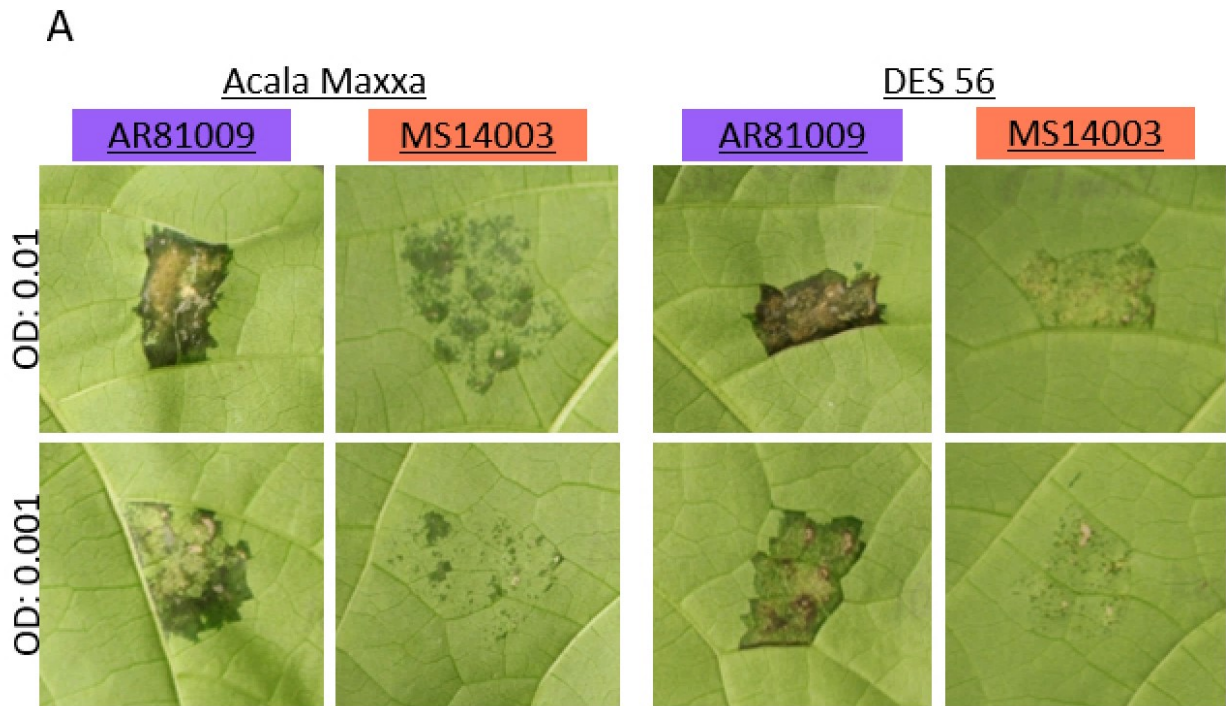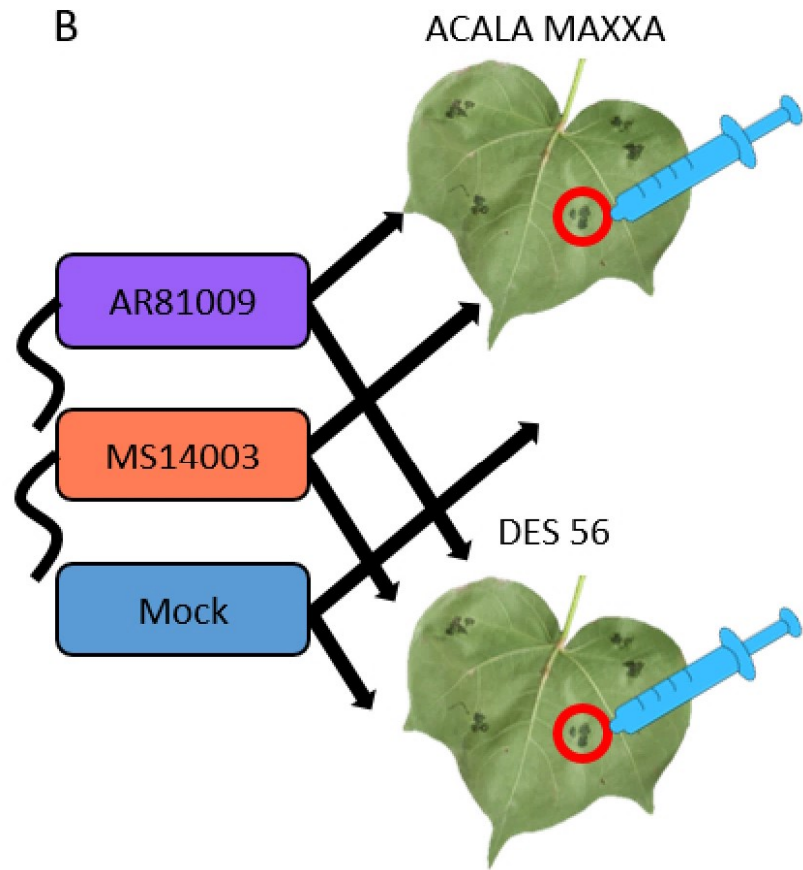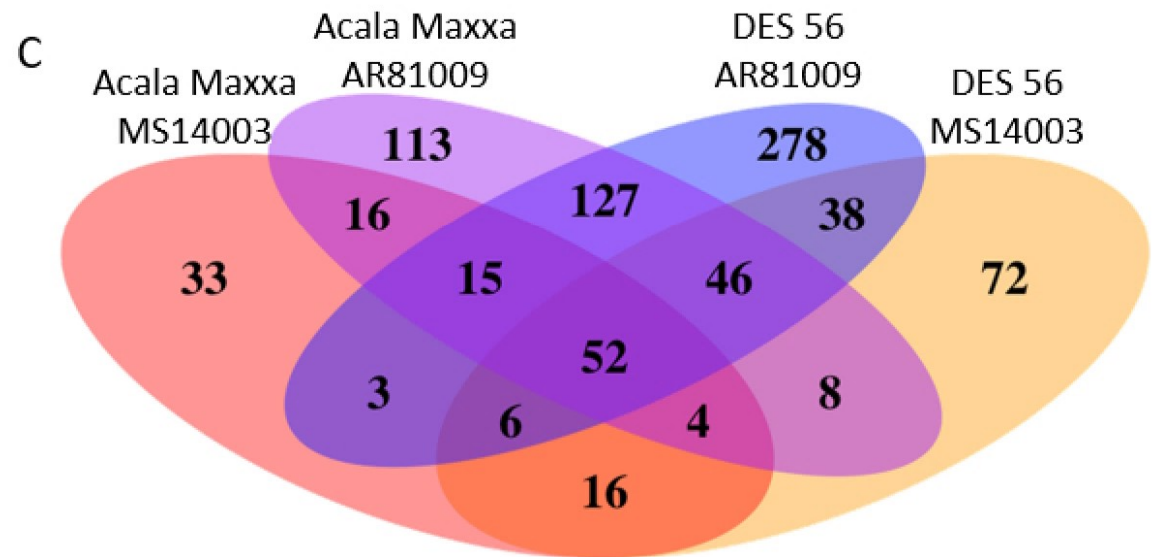

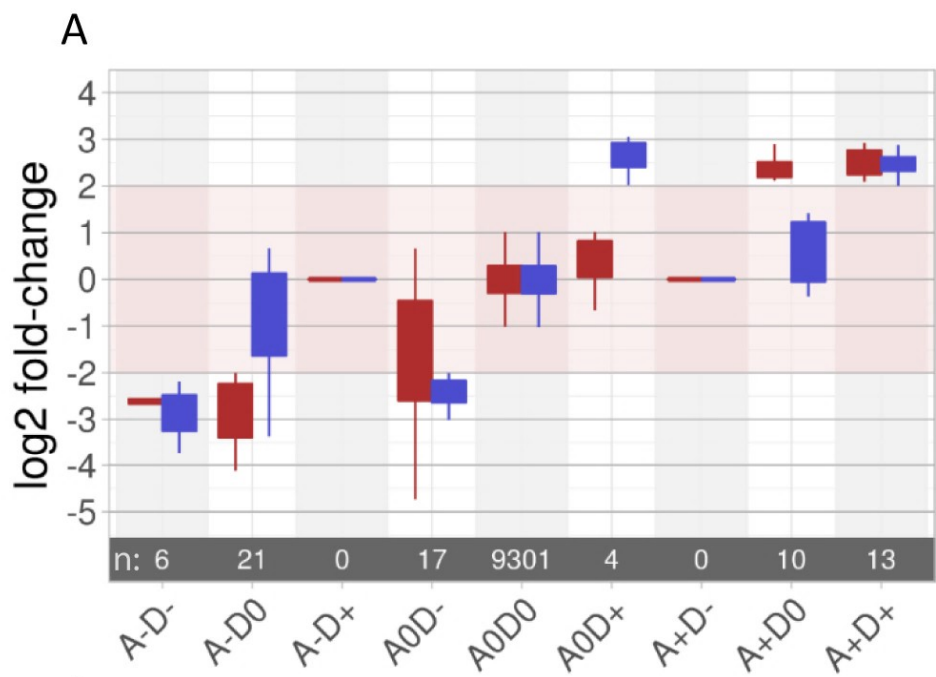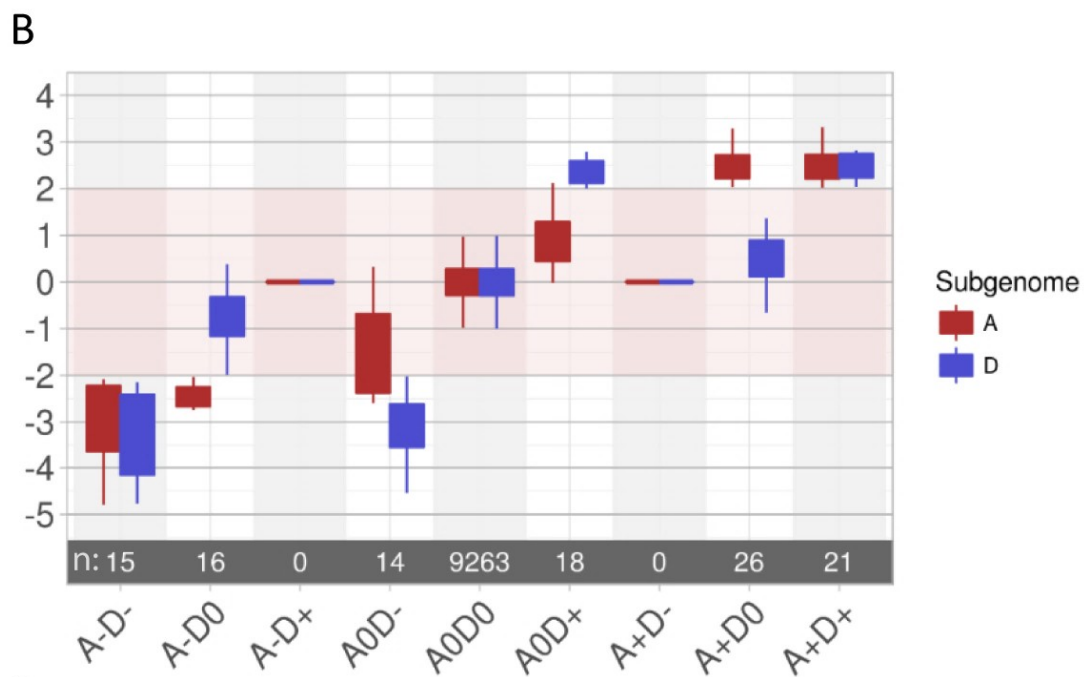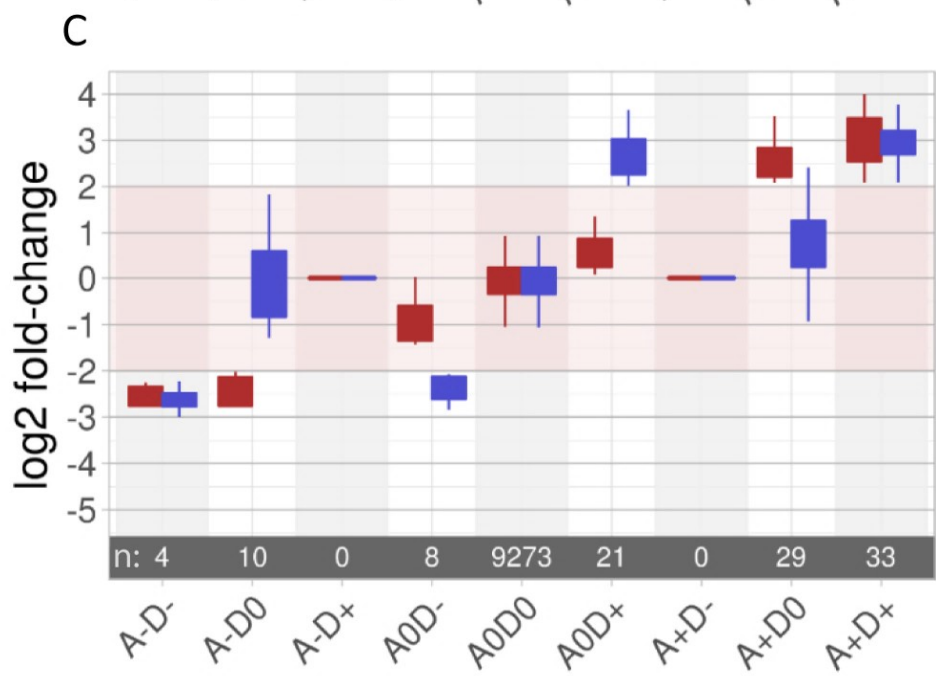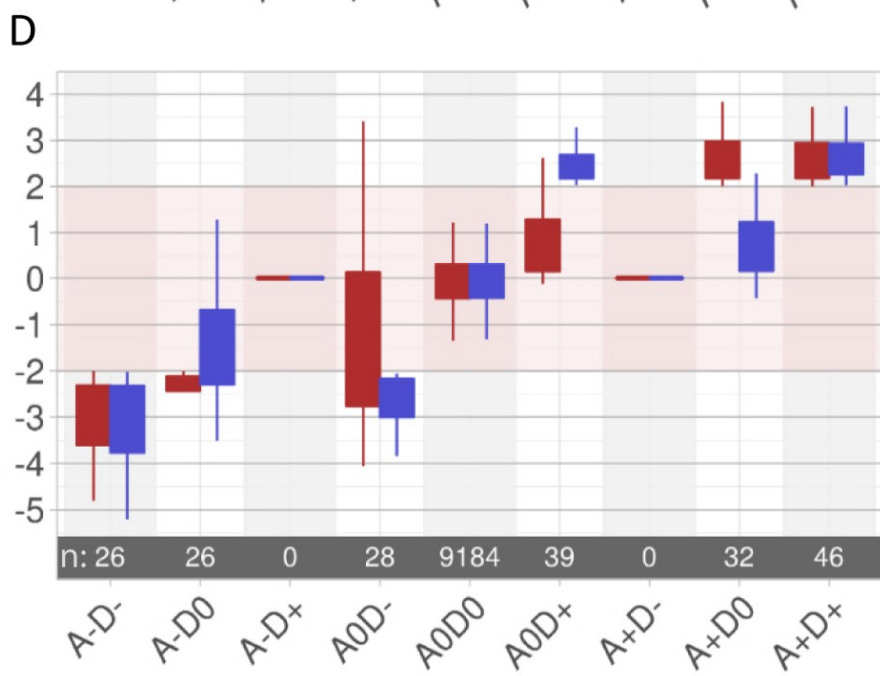



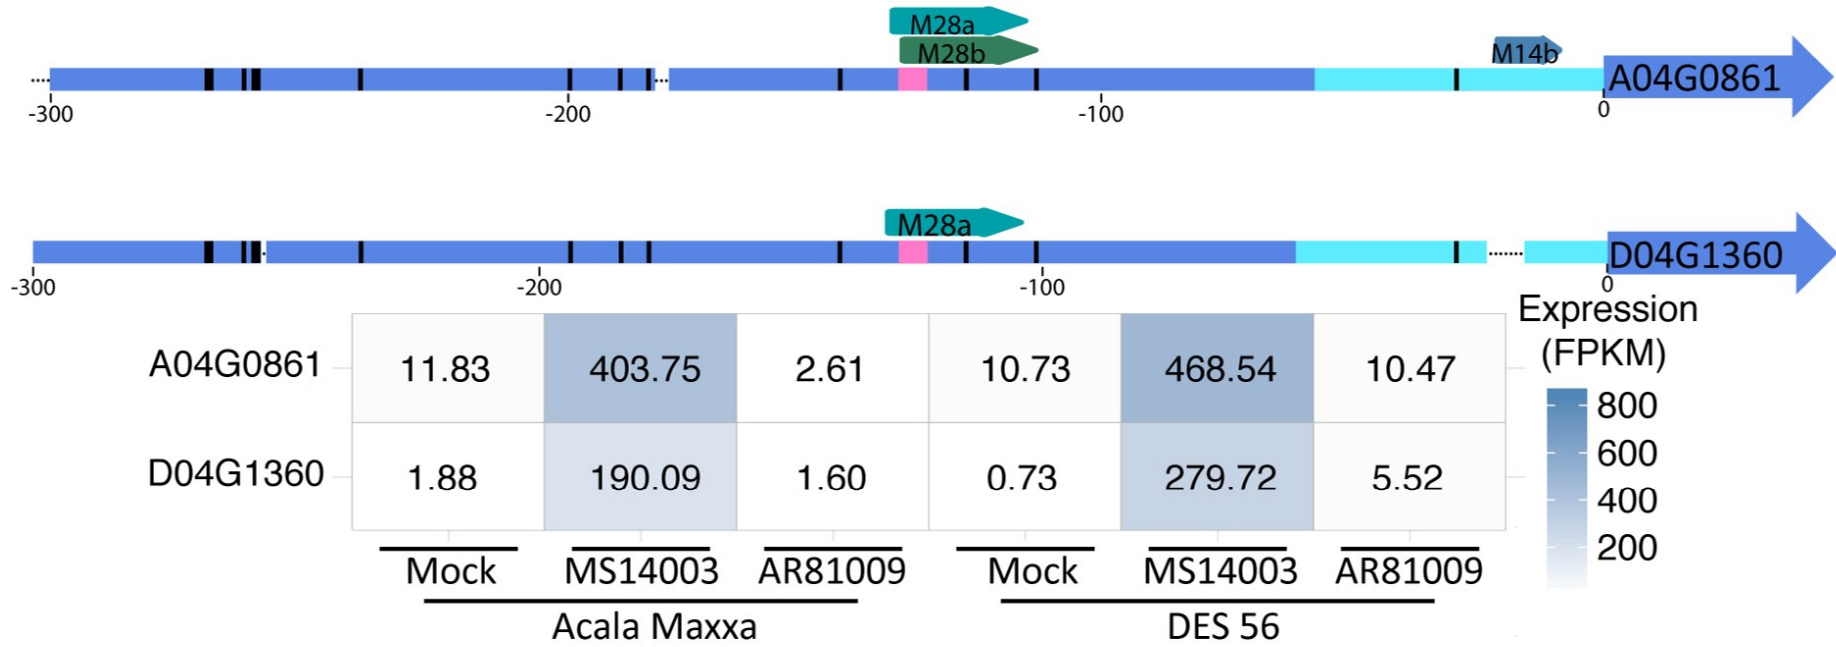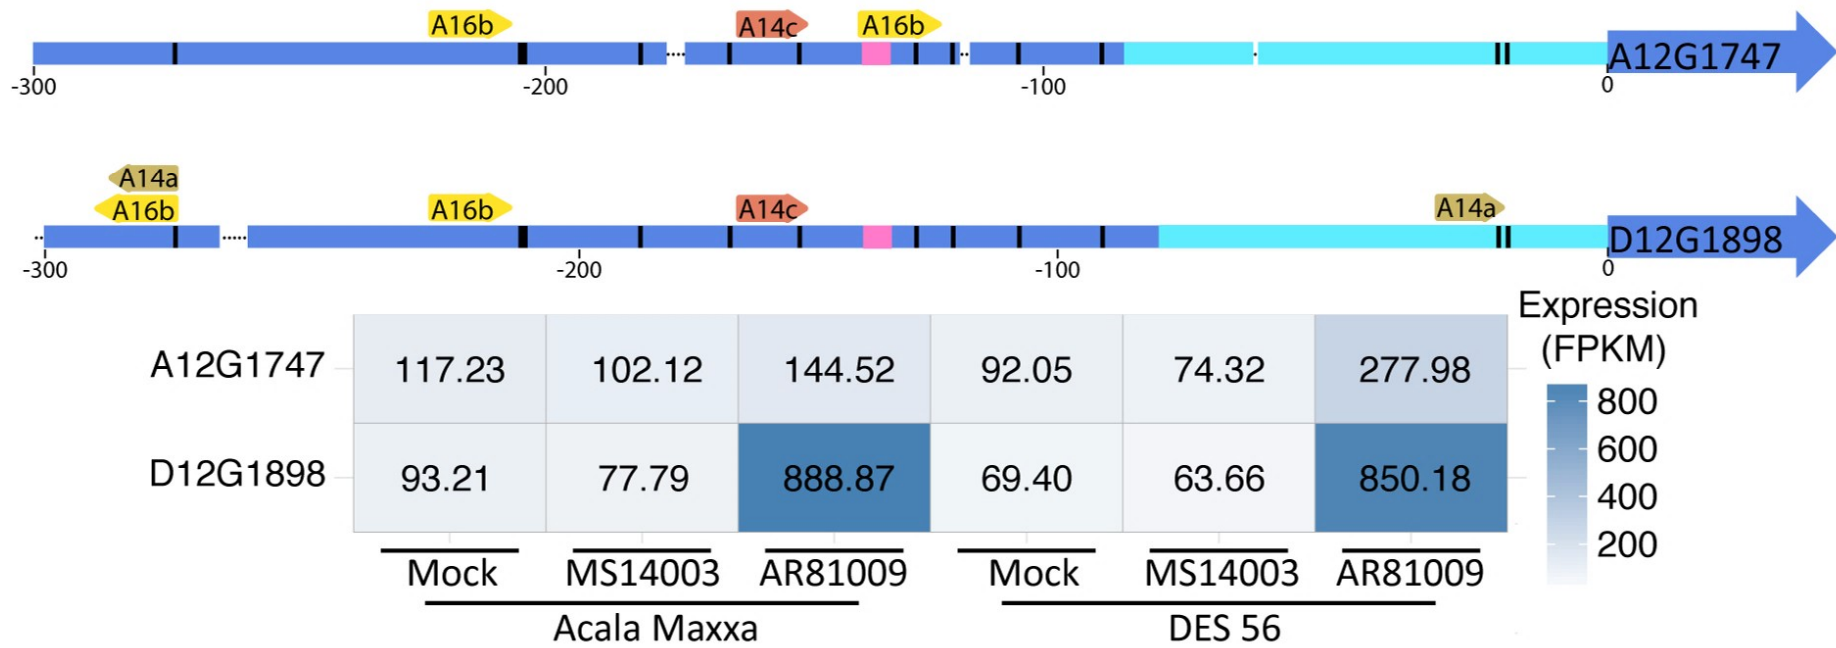

2011

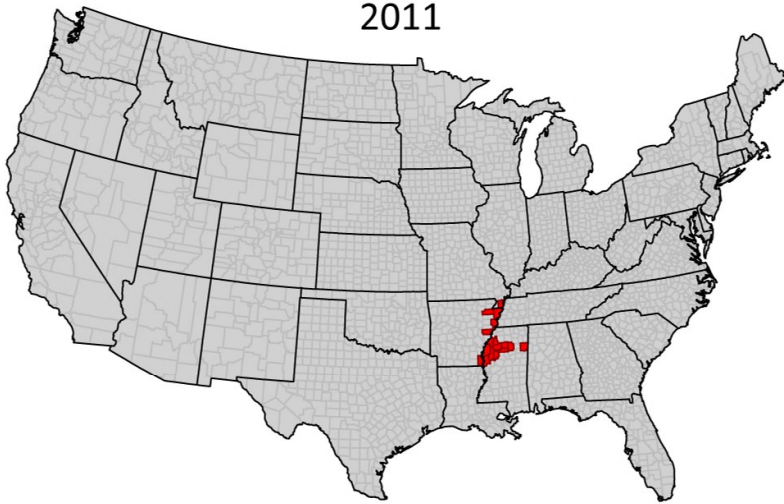

2012

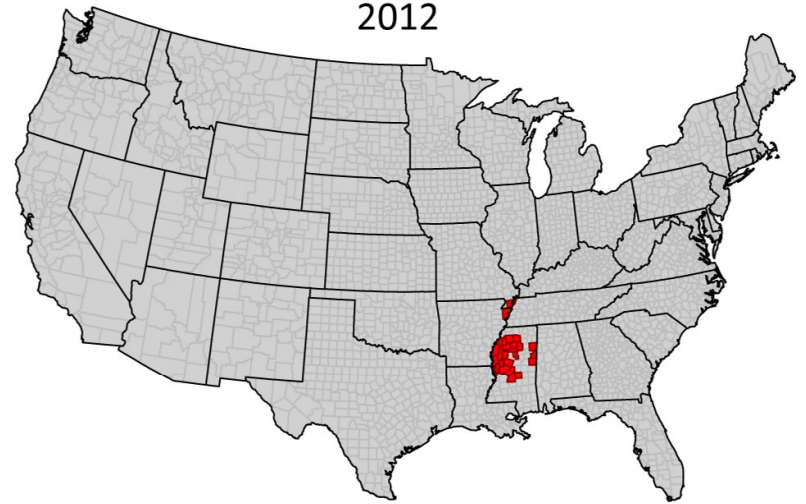

2014

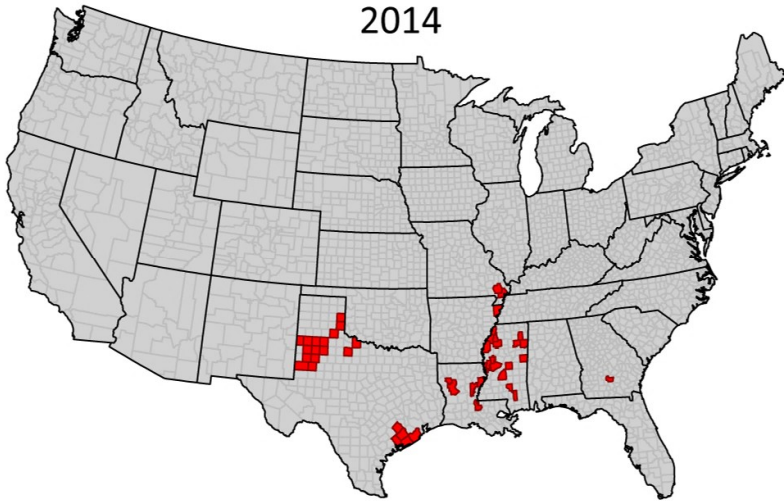

2015

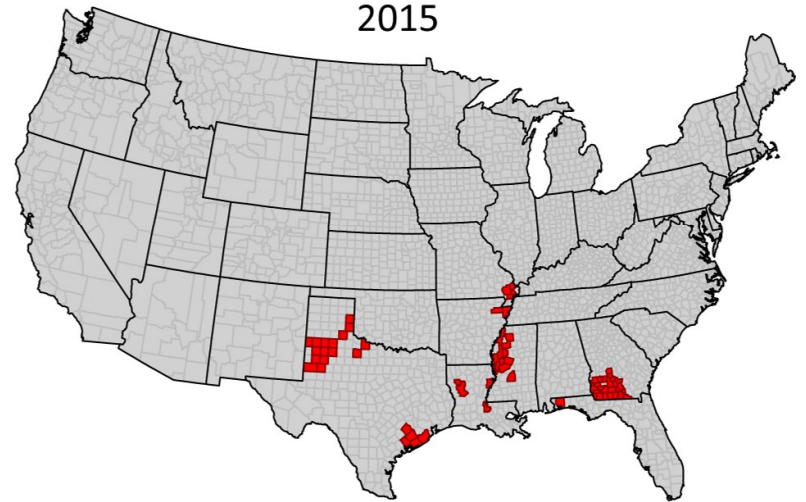

2016

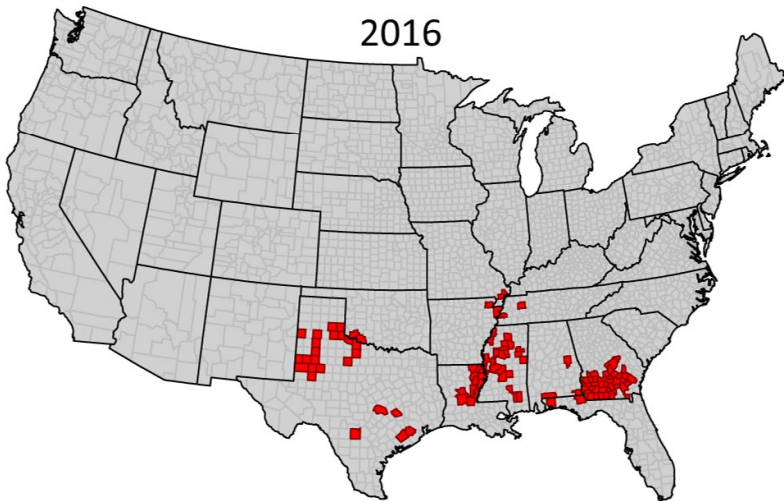

■ Counties with reported CBB incidence

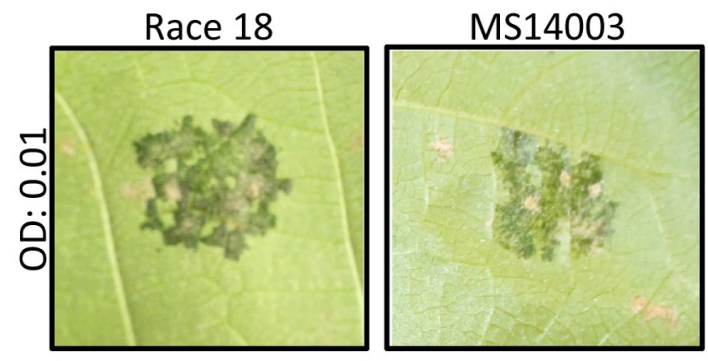

CFU Assay of *Xcm* Infected *G. hirsutum* at OD: 0.05

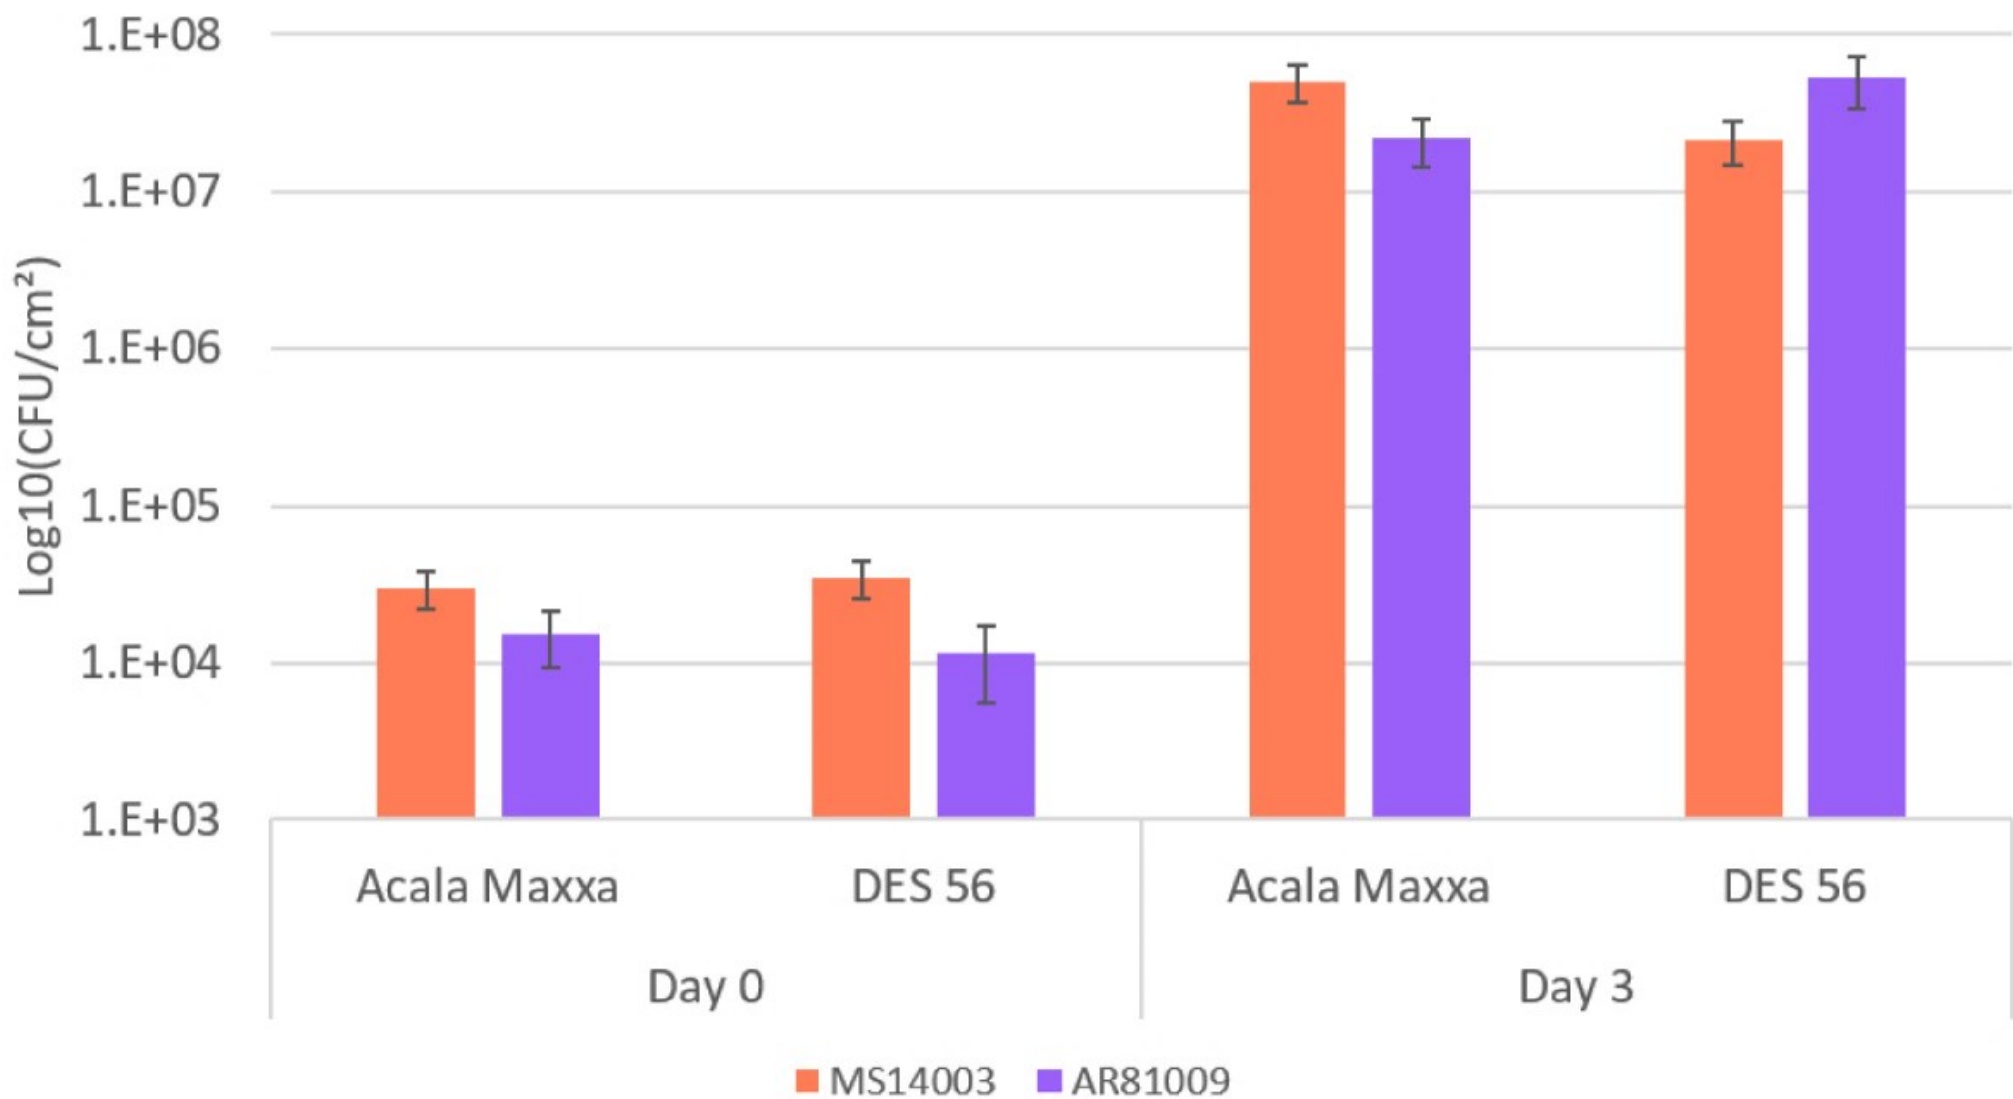

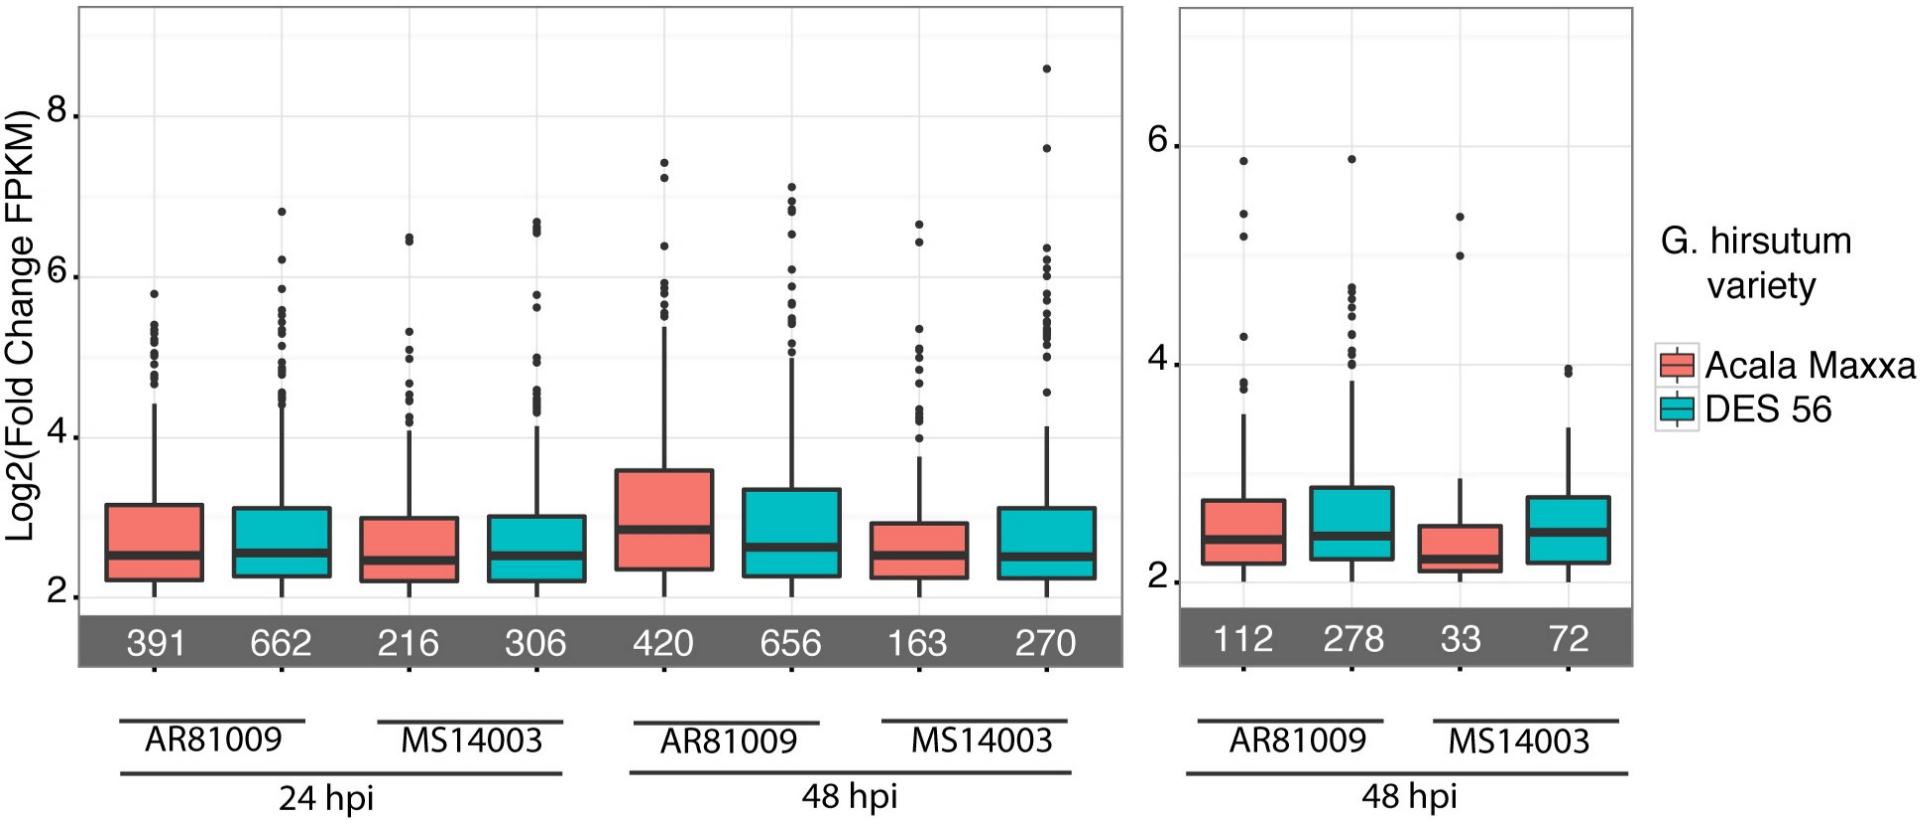

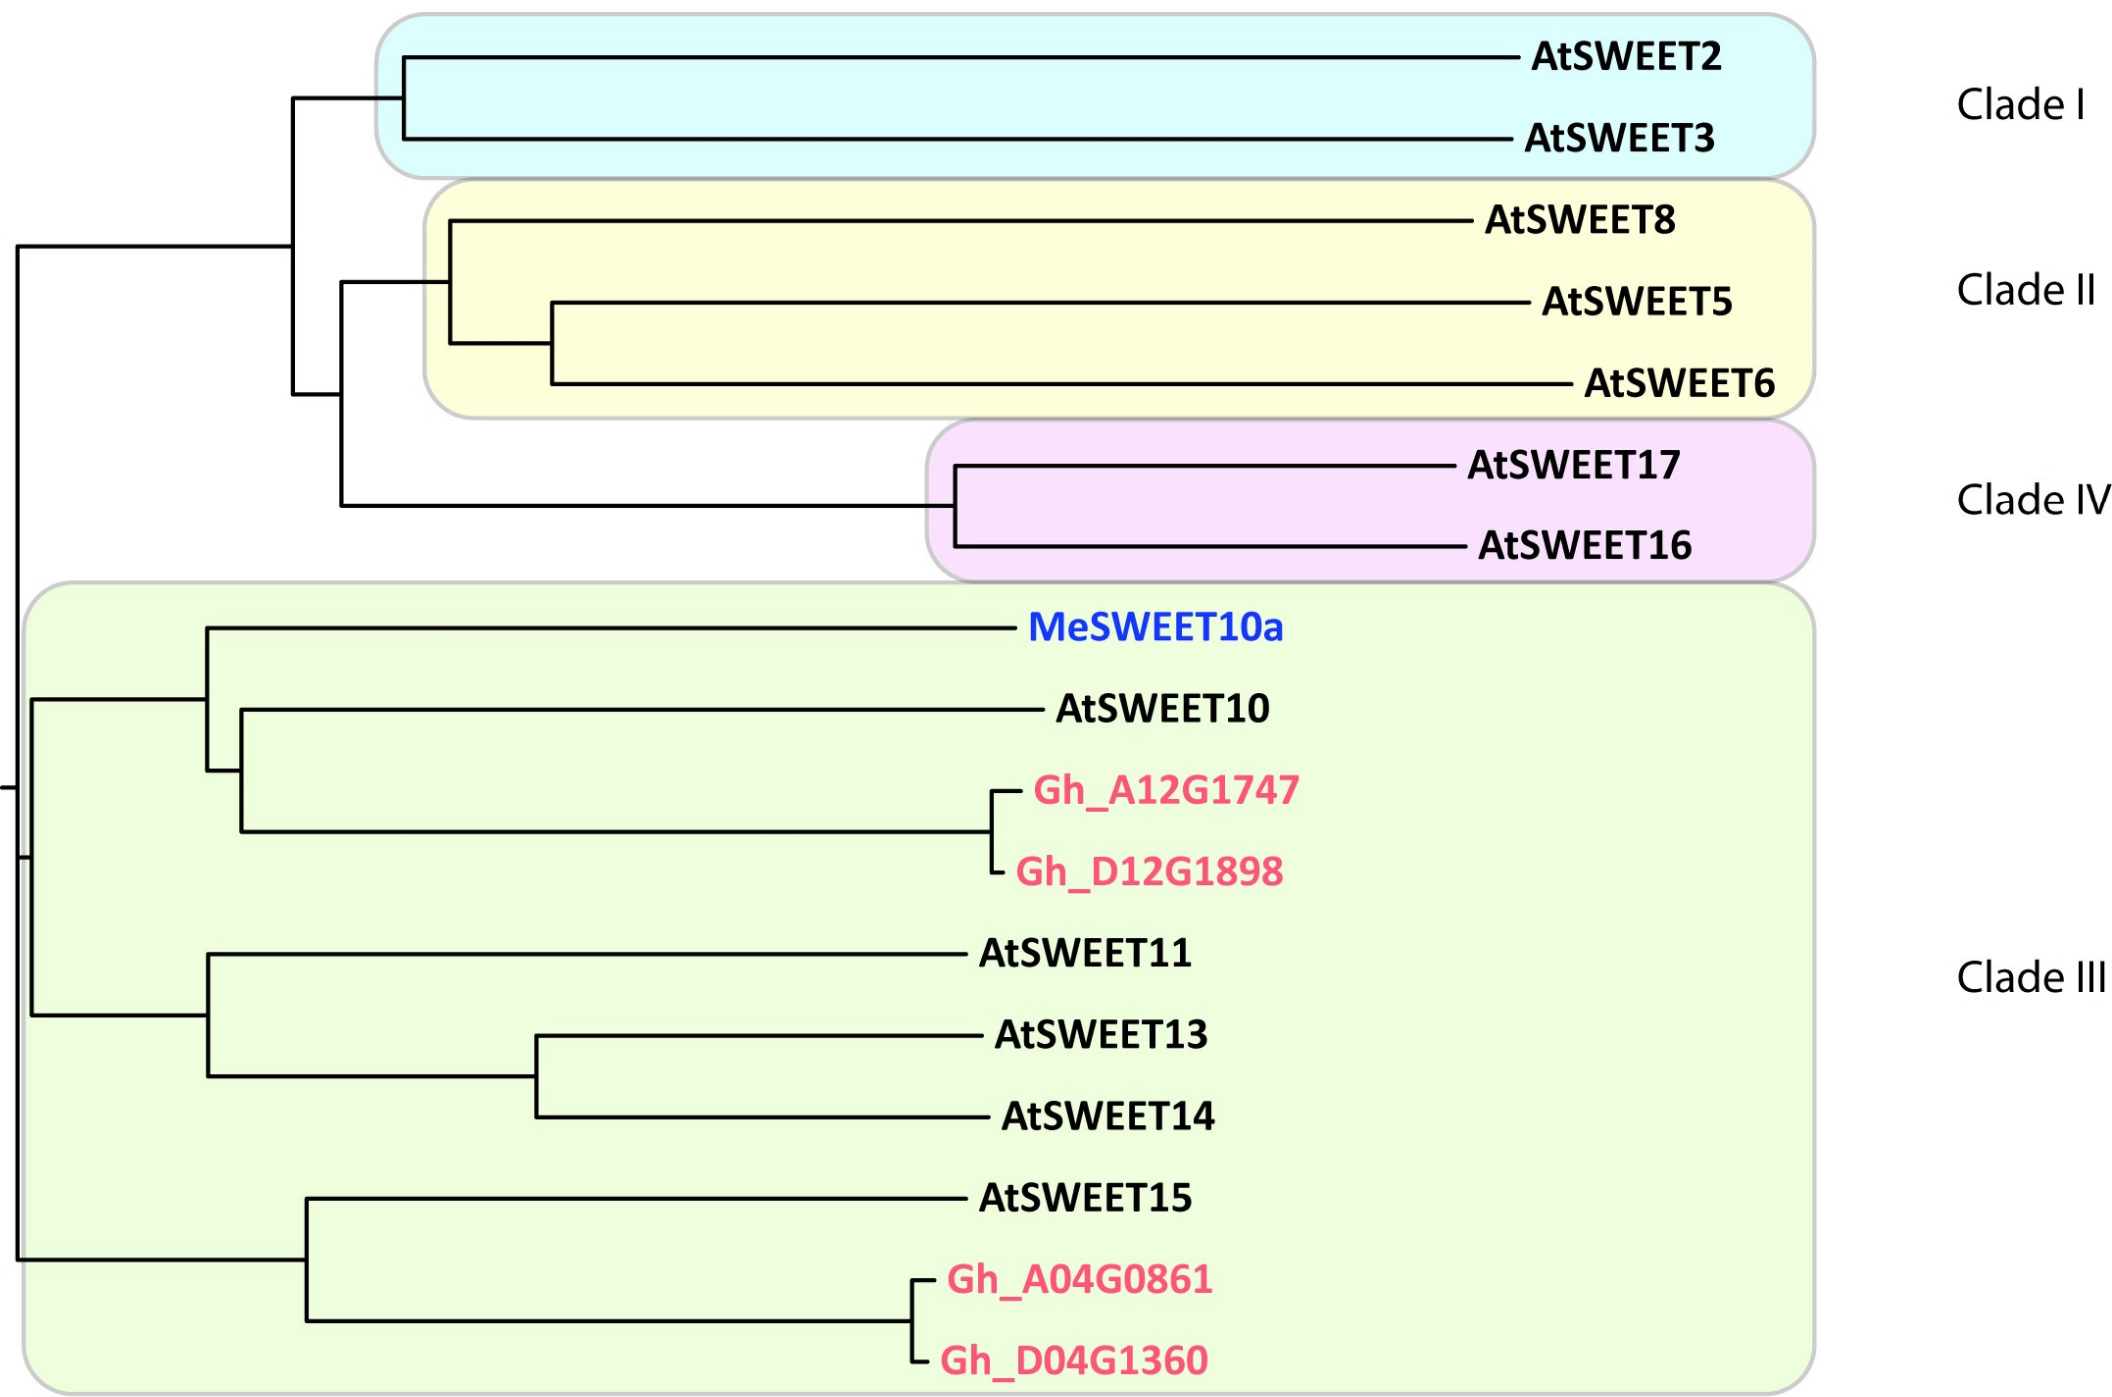

0.05
